# Supplementary material
Source: PubMed Central journal article supplement (PMC2626731)
Supplement: 0810766105_ST1_PDF.pdf [file 0810766105_ST1_PDF.pdf]

Table S1. Small RNA reads that were perfectly mapped to mRNAs

| Gene ID    | Strand | Start | End  | Total | DGCR8_WT | DGCR8_KO | Dicer_WT | Dicer_KO |
|------------|--------|-------|------|-------|----------|----------|----------|----------|
| BC137972.1 | +      | 1334  | 1349 | 1032  | 514      | 366      | 127      | 25       |
| AF413206.1 | -      | 431   | 415  | 943   | 184      | 343      | 350      | 66       |
| BC019506.1 | -      | 950   | 934  | 943   | 184      | 343      | 350      | 66       |
| BC019828.1 | -      | 960   | 944  | 943   | 184      | 343      | 350      | 66       |
| BC025839.1 | +      | 1385  | 1401 | 774   | 215      | 147      | 328      | 84       |
| AJ304796.1 | +      | 1404  | 1420 | 774   | 215      | 147      | 328      | 84       |
| BC019389.1 | +      | 1578  | 1594 | 525   | 190      | 161      | 148      | 26       |
| U53218.1   | +      | 1623  | 1639 | 525   | 190      | 161      | 148      | 26       |
| BC131687.1 | +      | 1632  | 1648 | 525   | 190      | 161      | 148      | 26       |
| BC131688.1 | +      | 1632  | 1648 | 525   | 190      | 161      | 148      | 26       |
| BC152550.1 | +      | 1632  | 1648 | 525   | 190      | 161      | 148      | 26       |
| X94616.1   | +      | 1632  | 1648 | 525   | 190      | 161      | 148      | 26       |
| BC017135.1 | -      | 3606  | 3590 | 421   | 138      | 177      | 90       | 16       |
| BC137979.1 | -      | 286   | 270  | 400   | 102      | 145      | 143      | 10       |
| BC145794.1 | -      | 286   | 270  | 400   | 102      | 145      | 143      | 10       |
| AF175282.1 | -      | 573   | 558  | 400   | 185      | 96       | 94       | 25       |
| BC020078.1 | -      | 2176  | 2160 | 400   | 102      | 145      | 143      | 10       |
| BC099952.1 | -      | 2711  | 2695 | 400   | 102      | 145      | 143      | 10       |
| BC089523.1 | -      | 2740  | 2724 | 400   | 102      | 145      | 143      | 10       |
| AF143683.1 | +      | 1585  | 1600 | 305   | 109      | 58       | 112      | 26       |
| BC079559.1 | -      | 2132  | 2117 | 223   | 86       | 78       | 58       | 1        |
| BC132167.1 | -      | 2140  | 2125 | 223   | 86       | 78       | 58       | 1        |
| BC132499.1 | -      | 2140  | 2125 | 223   | 86       | 78       | 58       | 1        |
| BC137972.1 | +      | 1331  | 1349 | 218   | 65       | 25       | 81       | 47       |
| BC137972.1 | +      | 1332  | 1349 | 201   | 59       | 27       | 65       | 50       |
| AF413206.1 | -      | 430   | 415  | 119   | 37       | 70       | 11       | 1        |
| BC019506.1 | -      | 949   | 934  | 119   | 37       | 70       | 11       | 1        |
| BC019828.1 | -      | 959   | 944  | 119   | 37       | 70       | 11       | 1        |
| BC025839.1 | +      | 1386  | 1401 | 116   | 53       | 53       | 9        | 1        |
| AJ304796.1 | +      | 1405  | 1420 | 116   | 53       | 53       | 9        | 1        |
| BC017135.1 | -      | 3605  | 3590 | 113   | 33       | 71       | 8        | 1        |
| AB002108.1 | +      | 326   | 341  | 111   | 51       | 26       | 34       | 0        |
| BC039768.1 | +      | 457   | 472  | 111   | 51       | 26       | 34       | 0        |
| AK172958.1 | +      | 497   | 512  | 111   | 51       | 26       | 34       | 0        |
| BC091645.1 | +      | 499   | 514  | 111   | 51       | 26       | 34       | 0        |
| AF022992.1 | +      | 551   | 566  | 111   | 51       | 26       | 34       | 0        |
| BC137972.1 | +      | 1333  | 1349 | 110   | 27       | 21       | 31       | 31       |

|            |   |      |      |    |    |    |    |    |
|------------|---|------|------|----|----|----|----|----|
| BC137972.1 | + | 1332 | 1348 | 96 | 29 | 27 | 25 | 15 |
| AF416641.1 | + | 392  | 408  | 76 | 12 | 30 | 22 | 12 |
| BC040767.1 | - | 623  | 607  | 76 | 12 | 30 | 22 | 12 |
| BC056487.1 | - | 1220 | 1204 | 76 | 12 | 30 | 22 | 12 |
| BC078639.1 | + | 2703 | 2719 | 76 | 12 | 30 | 22 | 12 |
| AF240694.1 | + | 292  | 307  | 70 | 22 | 20 | 21 | 7  |
| BC013594.1 | + | 336  | 351  | 70 | 22 | 20 | 21 | 7  |
| BC137972.1 | + | 1331 | 1348 | 63 | 20 | 8  | 23 | 12 |
| BC063076.1 | - | 2850 | 2835 | 61 | 24 | 31 | 4  | 2  |
| AB002108.1 | + | 325  | 340  | 54 | 16 | 16 | 14 | 8  |
| BC039768.1 | + | 456  | 471  | 54 | 16 | 16 | 14 | 8  |
| AK172958.1 | + | 496  | 511  | 54 | 16 | 16 | 14 | 8  |
| BC091645.1 | + | 498  | 513  | 54 | 16 | 16 | 14 | 8  |
| AF022992.1 | + | 550  | 565  | 54 | 16 | 16 | 14 | 8  |
| BC063262.1 | + | 173  | 188  | 51 | 20 | 21 | 10 | 0  |
| AK122231.1 | + | 394  | 409  | 51 | 20 | 21 | 10 | 0  |
| BC051164.1 | + | 394  | 409  | 51 | 20 | 21 | 10 | 0  |
| X14800.1   | - | 1087 | 1072 | 49 | 12 | 22 | 15 | 0  |
| M16819.1   | - | 1102 | 1087 | 49 | 12 | 22 | 15 | 0  |
| BC099464.1 | - | 1304 | 1289 | 49 | 12 | 22 | 15 | 0  |
| AF175282.1 | - | 573  | 557  | 45 | 13 | 8  | 17 | 7  |
| BC025839.1 | + | 1385 | 1400 | 40 | 12 | 24 | 4  | 0  |
| AJ304796.1 | + | 1404 | 1419 | 40 | 12 | 24 | 4  | 0  |
| BC115828.1 | - | 331  | 316  | 38 | 9  | 10 | 17 | 2  |
| AY217035.1 | - | 1074 | 1059 | 38 | 9  | 10 | 17 | 2  |
| BC137972.1 | + | 1333 | 1348 | 38 | 5  | 13 | 15 | 5  |
| AY261803.1 | - | 1408 | 1393 | 38 | 9  | 10 | 17 | 2  |
| AY261802.1 | - | 1439 | 1424 | 38 | 9  | 10 | 17 | 2  |
| AY261801.1 | - | 1496 | 1481 | 38 | 9  | 10 | 17 | 2  |
| AY261800.1 | - | 1514 | 1499 | 38 | 9  | 10 | 17 | 2  |
| AK220241.1 | - | 1564 | 1549 | 38 | 9  | 10 | 17 | 2  |
| AY261799.1 | - | 1676 | 1661 | 38 | 9  | 10 | 17 | 2  |
| L17305.1   | + | 485  | 503  | 37 | 9  | 7  | 9  | 12 |
| BC017135.1 | - | 3606 | 3591 | 35 | 13 | 22 | 0  | 0  |
| BC137979.1 | - | 286  | 269  | 34 | 7  | 11 | 5  | 11 |
| BC145794.1 | - | 286  | 269  | 34 | 7  | 11 | 5  | 11 |
| BC020078.1 | - | 2176 | 2159 | 34 | 7  | 11 | 5  | 11 |
| BC099952.1 | - | 2711 | 2694 | 34 | 7  | 11 | 5  | 11 |
| BC089523.1 | - | 2740 | 2723 | 34 | 7  | 11 | 5  | 11 |
| AF240694.1 | + | 291  | 307  | 29 | 12 | 4  | 10 | 3  |
| BC013594.1 | + | 335  | 351  | 29 | 12 | 4  | 10 | 3  |

|            |   |      |      |    |    |    |    |   |
|------------|---|------|------|----|----|----|----|---|
| AK129362.1 | + | 127  | 142  | 27 | 10 | 7  | 8  | 2 |
| BC058524.1 | + | 487  | 502  | 27 | 4  | 11 | 11 | 1 |
| AB037370.1 | + | 488  | 503  | 27 | 4  | 11 | 11 | 1 |
| BC002246.1 | + | 494  | 509  | 27 | 4  | 11 | 11 | 1 |
| BC052891.1 | + | 499  | 514  | 27 | 4  | 11 | 11 | 1 |
| BC085314.1 | + | 509  | 524  | 27 | 4  | 11 | 11 | 1 |
| BC110679.1 | + | 787  | 802  | 27 | 4  | 11 | 11 | 1 |
| X97818.1   | + | 1591 | 1606 | 27 | 10 | 7  | 8  | 2 |
| BC052397.1 | + | 1800 | 1815 | 27 | 10 | 7  | 8  | 2 |
| BC003207.1 | - | 56   | 39   | 26 | 9  | 9  | 7  | 1 |
| BC052501.1 | - | 120  | 103  | 26 | 9  | 9  | 7  | 1 |
| BC057193.1 | - | 140  | 123  | 26 | 9  | 9  | 7  | 1 |
| BC059822.1 | + | 2610 | 2627 | 26 | 9  | 9  | 7  | 1 |
| BC080708.1 | + | 765  | 790  | 25 | 6  | 6  | 7  | 6 |
| AF413206.1 | - | 431  | 416  | 24 | 4  | 15 | 4  | 1 |
| BC019506.1 | - | 950  | 935  | 24 | 4  | 15 | 4  | 1 |
| BC019828.1 | - | 960  | 945  | 24 | 4  | 15 | 4  | 1 |
| BC138260.1 | + | 1359 | 1374 | 24 | 8  | 8  | 7  | 1 |
| BC138261.1 | + | 1359 | 1374 | 24 | 8  | 8  | 7  | 1 |
| U90331.1   | + | 1817 | 1832 | 24 | 8  | 8  | 7  | 1 |
| AF413206.1 | - | 432  | 415  | 23 | 3  | 10 | 7  | 3 |
| BC019506.1 | - | 951  | 934  | 23 | 3  | 10 | 7  | 3 |
| BC019828.1 | - | 961  | 944  | 23 | 3  | 10 | 7  | 3 |
| BC056365.1 | - | 4563 | 4548 | 22 | 3  | 4  | 9  | 6 |
| BC080680.1 | + | 5638 | 5653 | 22 | 5  | 11 | 4  | 2 |
| BC011290.1 | - | 486  | 471  | 21 | 9  | 11 | 1  | 0 |
| BC083157.1 | - | 520  | 505  | 21 | 9  | 11 | 1  | 0 |
| L15353.1   | - | 82   | 62   | 20 | 9  | 4  | 6  | 1 |
| X75261.1   | - | 83   | 63   | 20 | 9  | 4  | 6  | 1 |
| L15352.1   | - | 97   | 77   | 20 | 9  | 4  | 6  | 1 |
| BC099446.1 | - | 625  | 609  | 20 | 3  | 2  | 8  | 7 |
| BC132540.1 | - | 632  | 616  | 20 | 3  | 2  | 8  | 7 |
| BC132542.1 | - | 632  | 616  | 20 | 3  | 2  | 8  | 7 |
| AY456960.1 | - | 642  | 626  | 20 | 3  | 2  | 8  | 7 |
| BC080708.1 | + | 768  | 790  | 20 | 2  | 4  | 8  | 6 |
| AF104312.1 | - | 1999 | 1984 | 18 | 10 | 5  | 2  | 1 |
| D38162.1   | - | 4291 | 4276 | 18 | 10 | 5  | 2  | 1 |
| BC052161.1 | - | 4427 | 4412 | 18 | 10 | 5  | 2  | 1 |
| L17305.1   | - | 502  | 484  | 17 | 0  | 3  | 7  | 7 |
| AF413206.1 | - | 431  | 414  | 16 | 1  | 5  | 6  | 4 |
| BC019506.1 | - | 950  | 933  | 16 | 1  | 5  | 6  | 4 |

|            |   |       |       |    |   |    |   |   |
|------------|---|-------|-------|----|---|----|---|---|
| BC019828.1 | - | 960   | 943   | 16 | 1 | 5  | 6 | 4 |
| BC083148.1 | + | 322   | 343   | 15 | 2 | 10 | 0 | 3 |
| L17305.1   | + | 485   | 502   | 14 | 4 | 3  | 6 | 1 |
| BC094679.1 | - | 506   | 491   | 14 | 9 | 2  | 1 | 2 |
| BC040802.1 | - | 710   | 695   | 14 | 9 | 2  | 1 | 2 |
| BC080708.1 | + | 767   | 790   | 14 | 1 | 5  | 7 | 1 |
| BC031451.1 | - | 126   | 111   | 13 | 3 | 5  | 5 | 0 |
| BC019389.1 | + | 1577  | 1594  | 13 | 2 | 6  | 5 | 0 |
| U53218.1   | + | 1622  | 1639  | 13 | 2 | 6  | 5 | 0 |
| BC131687.1 | + | 1631  | 1648  | 13 | 2 | 6  | 5 | 0 |
| BC131688.1 | + | 1631  | 1648  | 13 | 2 | 6  | 5 | 0 |
| BC152550.1 | + | 1631  | 1648  | 13 | 2 | 6  | 5 | 0 |
| X94616.1   | + | 1631  | 1648  | 13 | 2 | 6  | 5 | 0 |
| AF167404.1 | - | 2152  | 2137  | 13 | 2 | 3  | 7 | 1 |
| X95521.1   | - | 2162  | 2141  | 13 | 2 | 5  | 4 | 2 |
| BC099952.1 | - | 2440  | 2425  | 13 | 3 | 5  | 5 | 0 |
| BC089523.1 | - | 2469  | 2454  | 13 | 3 | 5  | 5 | 0 |
| AJ132271.1 | - | 3020  | 2999  | 13 | 2 | 5  | 4 | 2 |
| AF547435.1 | - | 3290  | 3269  | 13 | 2 | 5  | 4 | 2 |
| U58494.1   | - | 81    | 63    | 12 | 4 | 4  | 3 | 1 |
| Z36947.1   | - | 107   | 89    | 12 | 4 | 4  | 3 | 1 |
| AF201683.1 | + | 109   | 128   | 12 | 3 | 2  | 7 | 0 |
| AF454556.1 | - | 112   | 94    | 12 | 4 | 4  | 3 | 1 |
| AF454557.1 | - | 112   | 94    | 12 | 4 | 4  | 3 | 1 |
| AF454558.1 | - | 112   | 94    | 12 | 4 | 4  | 3 | 1 |
| AF454559.1 | - | 112   | 94    | 12 | 4 | 4  | 3 | 1 |
| AF177147.1 | - | 150   | 132   | 12 | 4 | 4  | 3 | 1 |
| AB086857.1 | + | 455   | 474   | 12 | 3 | 2  | 7 | 0 |
| BC062919.1 | + | 475   | 494   | 12 | 3 | 2  | 7 | 0 |
| BC066118.1 | + | 502   | 521   | 12 | 3 | 2  | 7 | 0 |
| AK131173.1 | + | 569   | 584   | 12 | 5 | 3  | 2 | 2 |
| BC068231.1 | + | 581   | 596   | 12 | 5 | 1  | 5 | 1 |
| AF369933.1 | - | 734   | 718   | 12 | 5 | 4  | 2 | 1 |
| AF006466.1 | + | 1180  | 1195  | 12 | 5 | 3  | 2 | 2 |
| AF215666.1 | + | 1258  | 1273  | 12 | 5 | 3  | 2 | 2 |
| BC020078.1 | - | 1876  | 1858  | 12 | 4 | 4  | 3 | 1 |
| AJ311906.1 | - | 14810 | 14794 | 12 | 5 | 4  | 2 | 1 |
| L17305.1   | + | 231   | 249   | 11 | 6 | 1  | 2 | 2 |
| BC137979.1 | - | 286   | 271   | 11 | 3 | 7  | 1 | 0 |
| BC145794.1 | - | 286   | 271   | 11 | 3 | 7  | 1 | 0 |
| AJ010736.1 | + | 383   | 398   | 11 | 5 | 3  | 3 | 0 |

---

|            |   |      |      |    |   |   |   |   |
|------------|---|------|------|----|---|---|---|---|
| BC050924.1 | + | 1381 | 1396 | 11 | 3 | 5 | 3 | 0 |
| BC020078.1 | - | 2176 | 2161 | 11 | 3 | 7 | 1 | 0 |
| BC099952.1 | - | 2711 | 2696 | 11 | 3 | 7 | 1 | 0 |
| AK129137.1 | + | 2727 | 2742 | 11 | 3 | 5 | 3 | 0 |
| BC089523.1 | - | 2740 | 2725 | 11 | 3 | 7 | 1 | 0 |
| AJ437291.1 | - | 19   | 3    | 10 | 1 | 2 | 5 | 2 |
| AJ437291.1 | - | 22   | 6    | 10 | 1 | 2 | 5 | 2 |
| AB086123.1 | - | 34   | 18   | 10 | 1 | 2 | 5 | 2 |
| AB086123.1 | - | 37   | 21   | 10 | 1 | 2 | 5 | 2 |
| AB086123.1 | - | 40   | 24   | 10 | 1 | 2 | 5 | 2 |
| BC108355.1 | - | 58   | 42   | 10 | 1 | 2 | 5 | 2 |
| U17331.1   | + | 82   | 102  | 10 | 3 | 2 | 5 | 0 |
| U17332.1   | + | 82   | 102  | 10 | 3 | 2 | 5 | 0 |
| X66473.1   | - | 102  | 86   | 10 | 1 | 2 | 5 | 2 |
| BC126921.1 | + | 110  | 126  | 10 | 1 | 2 | 5 | 2 |
| AF465243.1 | - | 116  | 100  | 10 | 1 | 2 | 5 | 2 |
| BC081435.1 | + | 122  | 142  | 10 | 3 | 2 | 5 | 0 |
| BC083329.1 | + | 125  | 145  | 10 | 3 | 2 | 5 | 0 |
| BC089319.1 | + | 125  | 145  | 10 | 3 | 2 | 5 | 0 |
| BC093526.1 | + | 125  | 145  | 10 | 3 | 2 | 5 | 0 |
| BC083166.1 | + | 127  | 147  | 10 | 3 | 2 | 5 | 0 |
| BC125320.1 | - | 133  | 117  | 10 | 1 | 2 | 5 | 2 |
| BC125322.1 | - | 133  | 117  | 10 | 1 | 2 | 5 | 2 |
| BC013165.1 | + | 136  | 156  | 10 | 3 | 2 | 5 | 0 |
| BC037368.1 | - | 141  | 126  | 10 | 7 | 2 | 1 | 0 |
| BC086937.1 | + | 143  | 163  | 10 | 3 | 2 | 5 | 0 |
| AF260271.1 | + | 146  | 166  | 10 | 3 | 2 | 5 | 0 |
| AF142630.3 | - | 168  | 152  | 10 | 1 | 2 | 5 | 2 |
| BC006688.1 | - | 181  | 165  | 10 | 1 | 2 | 5 | 2 |
| BC024852.1 | - | 181  | 165  | 10 | 1 | 2 | 5 | 2 |
| BC061130.1 | - | 192  | 176  | 10 | 1 | 2 | 5 | 2 |
| BC098225.1 | - | 206  | 190  | 10 | 1 | 2 | 5 | 2 |
| AF023482.1 | - | 224  | 208  | 10 | 1 | 2 | 5 | 2 |
| AF023483.1 | - | 224  | 208  | 10 | 1 | 2 | 5 | 2 |
| BC012971.1 | - | 224  | 208  | 10 | 4 | 1 | 3 | 2 |
| BC080788.1 | - | 232  | 216  | 10 | 1 | 2 | 5 | 2 |
| BC064035.1 | - | 282  | 266  | 10 | 1 | 2 | 5 | 2 |
| L17305.1   | - | 283  | 267  | 10 | 5 | 2 | 0 | 3 |
| BC064035.1 | - | 285  | 269  | 10 | 1 | 2 | 5 | 2 |
| BC141278.1 | - | 292  | 276  | 10 | 1 | 2 | 5 | 2 |
| BC141278.1 | - | 295  | 279  | 10 | 1 | 2 | 5 | 2 |

---

---

|            |   |      |      |    |   |   |   |   |
|------------|---|------|------|----|---|---|---|---|
| BC152351.1 | - | 336  | 320  | 10 | 1 | 2 | 5 | 2 |
| AF279255.1 | - | 414  | 399  | 10 | 7 | 2 | 1 | 0 |
| L17305.1   | + | 443  | 461  | 10 | 3 | 2 | 3 | 2 |
| BC114588.1 | - | 463  | 447  | 10 | 1 | 2 | 5 | 2 |
| BC114589.1 | - | 463  | 447  | 10 | 1 | 2 | 5 | 2 |
| AB049650.1 | - | 468  | 453  | 10 | 7 | 2 | 1 | 0 |
| BC052214.1 | - | 472  | 457  | 10 | 7 | 2 | 1 | 0 |
| BC085278.1 | - | 594  | 578  | 10 | 1 | 2 | 5 | 2 |
| BC092378.1 | - | 598  | 582  | 10 | 1 | 2 | 5 | 2 |
| M33212.1   | - | 614  | 598  | 10 | 1 | 2 | 5 | 2 |
| BC054755.1 | - | 616  | 600  | 10 | 1 | 2 | 5 | 2 |
| BC090843.1 | - | 616  | 600  | 10 | 1 | 2 | 5 | 2 |
| BC099446.1 | - | 625  | 610  | 10 | 2 | 2 | 5 | 1 |
| BC132540.1 | - | 632  | 617  | 10 | 2 | 2 | 5 | 1 |
| BC132542.1 | - | 632  | 617  | 10 | 2 | 2 | 5 | 1 |
| BC089546.1 | - | 633  | 617  | 10 | 1 | 2 | 5 | 2 |
| AY456960.1 | - | 642  | 627  | 10 | 2 | 2 | 5 | 1 |
| BC099426.1 | - | 647  | 632  | 10 | 7 | 2 | 1 | 0 |
| BC138647.1 | - | 672  | 656  | 10 | 1 | 2 | 5 | 2 |
| BC138648.1 | - | 672  | 656  | 10 | 1 | 2 | 5 | 2 |
| BC096472.1 | - | 685  | 669  | 10 | 1 | 2 | 5 | 2 |
| AB093283.1 | - | 702  | 686  | 10 | 1 | 2 | 5 | 2 |
| AF091096.1 | - | 795  | 779  | 10 | 1 | 2 | 5 | 2 |
| AF335250.2 | - | 808  | 792  | 10 | 1 | 2 | 5 | 2 |
| AF097416.1 | - | 836  | 820  | 10 | 1 | 2 | 5 | 2 |
| AF158597.1 | - | 918  | 902  | 10 | 1 | 2 | 5 | 2 |
| AF158597.1 | - | 921  | 905  | 10 | 1 | 2 | 5 | 2 |
| AF158597.1 | - | 924  | 908  | 10 | 1 | 2 | 5 | 2 |
| AF158597.1 | - | 927  | 911  | 10 | 1 | 2 | 5 | 2 |
| BC023029.1 | - | 930  | 914  | 10 | 1 | 2 | 5 | 2 |
| BC023029.1 | - | 933  | 917  | 10 | 1 | 2 | 5 | 2 |
| AB212898.1 | - | 941  | 925  | 10 | 1 | 2 | 5 | 2 |
| BC131677.1 | - | 944  | 928  | 10 | 1 | 2 | 5 | 2 |
| DQ185133.1 | - | 947  | 931  | 10 | 1 | 2 | 5 | 2 |
| BC139167.1 | - | 1008 | 992  | 10 | 1 | 2 | 5 | 2 |
| BC139168.1 | - | 1008 | 992  | 10 | 1 | 2 | 5 | 2 |
| AF132218.1 | - | 1027 | 1011 | 10 | 1 | 2 | 5 | 2 |
| AF132218.1 | - | 1030 | 1014 | 10 | 1 | 2 | 5 | 2 |
| AF132218.1 | - | 1033 | 1017 | 10 | 1 | 2 | 5 | 2 |
| AF132218.1 | - | 1036 | 1020 | 10 | 1 | 2 | 5 | 2 |
| U86338.1   | - | 1065 | 1049 | 10 | 1 | 2 | 5 | 2 |

---

|            |   |      |      |    |   |    |   |   |
|------------|---|------|------|----|---|----|---|---|
| AF158597.1 | - | 1074 | 1058 | 10 | 1 | 2  | 5 | 2 |
| BC025136.1 | - | 1161 | 1145 | 10 | 1 | 2  | 5 | 2 |
| AF004295.1 | - | 1165 | 1149 | 10 | 1 | 2  | 5 | 2 |
| AF132218.1 | - | 1183 | 1167 | 10 | 1 | 2  | 5 | 2 |
| BC035954.1 | - | 1207 | 1191 | 10 | 1 | 2  | 5 | 2 |
| BC100362.1 | - | 1223 | 1208 | 10 | 7 | 2  | 1 | 0 |
| AY352586.2 | - | 1245 | 1229 | 10 | 1 | 2  | 5 | 2 |
| BC132140.1 | - | 1276 | 1260 | 10 | 1 | 2  | 5 | 2 |
| Z48043.1   | - | 1317 | 1301 | 10 | 1 | 2  | 5 | 2 |
| BC025432.1 | - | 1343 | 1327 | 10 | 1 | 2  | 5 | 2 |
| BC025432.1 | - | 1346 | 1330 | 10 | 1 | 2  | 5 | 2 |
| BC025432.1 | - | 1349 | 1333 | 10 | 1 | 2  | 5 | 2 |
| BC025432.1 | - | 1352 | 1336 | 10 | 1 | 2  | 5 | 2 |
| AF411816.1 | - | 1369 | 1353 | 10 | 1 | 2  | 5 | 2 |
| AF411816.1 | - | 1372 | 1356 | 10 | 1 | 2  | 5 | 2 |
| BC050924.1 | + | 1382 | 1397 | 10 | 6 | 2  | 1 | 1 |
| BC004006.1 | - | 1524 | 1508 | 10 | 1 | 2  | 5 | 2 |
| BC141388.1 | - | 1539 | 1523 | 10 | 1 | 2  | 5 | 2 |
| AK220496.1 | - | 1609 | 1593 | 10 | 1 | 2  | 5 | 2 |
| BC096033.1 | - | 1630 | 1614 | 10 | 1 | 2  | 5 | 2 |
| BC075672.1 | - | 1673 | 1657 | 10 | 1 | 2  | 5 | 2 |
| AY273809.1 | - | 1718 | 1702 | 10 | 1 | 2  | 5 | 2 |
| BC029834.1 | - | 1725 | 1709 | 10 | 1 | 2  | 5 | 2 |
| BC064711.1 | - | 1755 | 1739 | 10 | 1 | 2  | 5 | 2 |
| BC113150.1 | - | 1755 | 1739 | 10 | 1 | 2  | 5 | 2 |
| BC113150.1 | - | 1758 | 1742 | 10 | 1 | 2  | 5 | 2 |
| BC113150.1 | - | 1761 | 1745 | 10 | 1 | 2  | 5 | 2 |
| Z98263.1   | - | 1774 | 1758 | 10 | 1 | 2  | 5 | 2 |
| Z98263.1   | - | 1777 | 1761 | 10 | 1 | 2  | 5 | 2 |
| Z98263.1   | - | 1780 | 1764 | 10 | 1 | 2  | 5 | 2 |
| BC054393.1 | - | 1797 | 1781 | 10 | 1 | 2  | 5 | 2 |
| AF184902.1 | - | 1833 | 1817 | 10 | 1 | 2  | 5 | 2 |
| AF184902.1 | - | 1836 | 1820 | 10 | 1 | 2  | 5 | 2 |
| AF184902.1 | - | 1839 | 1823 | 10 | 1 | 2  | 5 | 2 |
| AB008674.1 | - | 2060 | 2044 | 10 | 1 | 2  | 5 | 2 |
| AB008674.1 | - | 2063 | 2047 | 10 | 1 | 2  | 5 | 2 |
| AJ428208.1 | - | 2078 | 2063 | 10 | 0 | 10 | 0 | 0 |
| X95521.1   | - | 2159 | 2143 | 10 | 1 | 2  | 5 | 2 |
| X95521.1   | - | 2162 | 2146 | 10 | 1 | 2  | 5 | 2 |
| X95521.1   | - | 2165 | 2149 | 10 | 1 | 2  | 5 | 2 |
| AF490392.1 | - | 2444 | 2428 | 10 | 1 | 2  | 5 | 2 |

|                               |   |      |      |    |      |      |      |      |
|-------------------------------|---|------|------|----|------|------|------|------|
| BC037711.1                    | - | 2484 | 2468 | 10 | 1    | 2    | 5    | 2    |
| BC027187.1                    | - | 2643 | 2627 | 10 | 1    | 2    | 5    | 2    |
| BC027187.1                    | - | 2646 | 2630 | 10 | 1    | 2    | 5    | 2    |
| BC034098.1                    | - | 2689 | 2673 | 10 | 1    | 2    | 5    | 2    |
| AK129137.1                    | + | 2728 | 2743 | 10 | 6    | 2    | 1    | 1    |
| AJ132271.1                    | - | 3017 | 3001 | 10 | 1    | 2    | 5    | 2    |
| AJ132271.1                    | - | 3020 | 3004 | 10 | 1    | 2    | 5    | 2    |
| AJ132271.1                    | - | 3023 | 3007 | 10 | 1    | 2    | 5    | 2    |
| AF547435.1                    | - | 3287 | 3271 | 10 | 1    | 2    | 5    | 2    |
| AF547435.1                    | - | 3290 | 3274 | 10 | 1    | 2    | 5    | 2    |
| AF547435.1                    | - | 3293 | 3277 | 10 | 1    | 2    | 5    | 2    |
| AF227274.1                    | + | 3362 | 3378 | 10 | 1    | 2    | 5    | 2    |
| AF282772.1                    | + | 3362 | 3378 | 10 | 1    | 2    | 5    | 2    |
| AF282773.1                    | + | 3362 | 3378 | 10 | 1    | 2    | 5    | 2    |
| BC137706.1                    | - | 3656 | 3640 | 10 | 1    | 2    | 5    | 2    |
| BC060651.1                    | - | 3666 | 3650 | 10 | 1    | 2    | 5    | 2    |
| BC059227.1                    | - | 3792 | 3776 | 10 | 1    | 2    | 5    | 2    |
| BC058970.1                    | - | 4072 | 4056 | 10 | 1    | 2    | 5    | 2    |
| BC058970.1                    | - | 4075 | 4059 | 10 | 1    | 2    | 5    | 2    |
| AB093241.1                    | - | 4521 | 4505 | 10 | 1    | 2    | 5    | 2    |
| AB093241.1                    | - | 4524 | 4508 | 10 | 1    | 2    | 5    | 2    |
| BC085157.1                    | - | 5103 | 5087 | 10 | 1    | 2    | 5    | 2    |
| BC085157.1                    | - | 5106 | 5090 | 10 | 1    | 2    | 5    | 2    |
| BC141410.1                    | - | 6099 | 6083 | 10 | 1    | 2    | 5    | 2    |
| Number of Reads               |   |      |      |    | 5649 | 6022 | 5978 | 1417 |
| Normalized<br>Number of Reads |   |      |      |    | 5649 | 7128 | 5978 | 2340 |
| Normalized<br>Expression      |   |      |      |    | 100% | 126% | 100% | 39%  |

Note: The reads number in the table were provided as raw data and not being normalized.

Small RNA reads with more than 10 hits from all four libraries were shown. The expression of these small RNAs were generally independent of DGCR8 whereas they were depleted by an average of 60% in the *Dicer* null sample.</>
