# Supplementary material
Source: PubMed Central journal article supplement (PMC2626731)
Supplement: 0810766105_ST2_PDF.pdf [file 0810766105_ST2_PDF.pdf]

Table S2: Small RNA reads that are mapped to sn/snoRNAs

| Sequences that mapped to sn/snoRNA | Total | DGCR8_WT | DGCR8_KO | Dicer_WT | Dicer_KO |
|------------------------------------|-------|----------|----------|----------|----------|
| UGCAAUGAUGUCAUCUUACUACUGAA         | 272   | 93       | 57       | 84       | 38       |
| AAGGUAGAUAGAACAGGUCUU              | 161   | 67       | 42       | 52       | 0        |
| UUGGAGUUCAUGCAAGUUCUAAAC           | 101   | 41       | 38       | 20       | 2        |
| AAGGUAGAUAGAACAGGUCUUG             | 80    | 34       | 18       | 27       | 1        |
| UAUCUGUGAGGAUAAGUAACUCUGAG         | 73    | 35       | 14       | 22       | 2        |
| UGCAAUGAUGUCAUCUUACUACUGA          | 53    | 22       | 8        | 18       | 5        |
| UUGCAAUGAUGUCAUCUUACUACUGA         | 44    | 18       | 11       | 10       | 5        |
| CUCUGUGCUGAAUGUCAAGUUCUGAU         | 39    | 14       | 6        | 16       | 3        |
| CCACGAGGACGAGACGUAGC               | 35    | 11       | 6        | 10       | 8        |
| AGGUAGAUAGAACAGGUCUUG              | 32    | 13       | 4        | 15       | 0        |
| AAGGUAGAUAGAACAGGUCU               | 31    | 11       | 11       | 9        | 0        |
| GGAGGGAACGCAGUCUGAGUGG             | 30    | 12       | 2        | 6        | 10       |
| CCAGCCUGGGCUACACAUUU               | 30    | 5        | 10       | 12       | 3        |
| AGGUAGAUAGAACAGGUCUU               | 29    | 15       | 6        | 7        | 1        |
| CAGCCUGGGCUACACAUUU                | 27    | 2        | 4        | 13       | 8        |
| CAGCCUGGGCUACACAUUUU               | 26    | 4        | 3        | 9        | 10       |
| UCGCUGUGAUGAUGGA                   | 26    | 5        | 17       | 1        | 3        |
| GGGAGGGAACGCAGUCUGAGUGG            | 26    | 8        | 5        | 9        | 4        |
| CUGAAAUGAAGAGAAUACUCUUGCUG         | 25    | 10       | 7        | 7        | 1        |
| CCAGCCUGGGCUACACAUUUU              | 25    | 4        | 4        | 7        | 10       |
| UUGGAGUUCAUGCAAGUUCUAAACC          | 23    | 9        | 13       | 1        | 0        |
| CCAGCCUGGGCUACACAUU                | 23    | 3        | 3        | 9        | 8        |
| CCGGGUGAUGCGAAUCGUAUUCUGAG         | 22    | 11       | 5        | 5        | 1        |
| UAUGGAGGUCUCUGUCUGACU              | 21    | 11       | 5        | 5        | 0        |
| UUGGAGUUCAUGCAAGUUCUAA             | 19    | 4        | 9        | 6        | 0        |
| UCGCUGUGAUGAUGGAU                  | 18    | 6        | 8        | 1        | 3        |
| GAAAUGAUGAUUGGAG                   | 18    | 7        | 4        | 0        | 7        |

|                            |    |    |    |   |   |
|----------------------------|----|----|----|---|---|
| UGAAAUGAAGAGAAUACUCUUGCUGA | 18 | 12 | 3  | 3 | 0 |
| UGCAAUGAUGUCAUCUACUACUG    | 18 | 6  | 2  | 6 | 4 |
| GUUCUGUGAUGAGGCUCUGGA      | 17 | 1  | 14 | 0 | 2 |
| AGACCUACUUAUCUACCAACA      | 16 | 6  | 6  | 4 | 0 |
| CAGCCUGGGCUACACAUU         | 15 | 0  | 4  | 7 | 4 |
| UUGGAGUUCAUGCAAGUUC        | 15 | 3  | 6  | 6 | 0 |
| UCGCUGUGAUGAUGGAUU         | 14 | 2  | 9  | 0 | 3 |
| CUACGGGGAUGAU AUG          | 14 | 5  | 4  | 4 | 1 |
| GGAGGAUU AUGUGUGACAGAC     | 14 | 6  | 5  | 3 | 0 |
| CGGCGAUGAUGACACUC          | 14 | 3  | 6  | 3 | 2 |
| CAGCCUGGGCUACACAUUUUU      | 13 | 3  | 4  | 4 | 2 |
| AGUUUCUCUGACUGUGUAGAG      | 13 | 1  | 10 | 2 | 0 |
| CAUCCUGGUUGCUCUUAUCUGAU    | 13 | 0  | 6  | 0 | 7 |
| ACAUCCUGGUUGCUCUUAUCUGAU   | 13 | 2  | 3  | 0 | 8 |
| AGACCUACUUAUCUACCAACAG     | 13 | 7  | 3  | 3 | 0 |
| CGGCGAUGAUGACACU           | 12 | 2  | 6  | 4 | 0 |
| CUACGGGGAUGAU AUGA         | 12 | 2  | 3  | 4 | 3 |
| UUACUUGAUGAUAGUAAAAGAUCUG  | 12 | 5  | 3  | 2 | 2 |
| UGAAAUGAAGAGAAUACUCUUGCUG  | 11 | 5  | 2  | 4 | 0 |
| GUUGCCUUCUUCUGA            | 11 | 8  | 1  | 1 | 1 |
| UUACUUGAUGAUAGUAAAAGAUCUGA | 10 | 4  | 3  | 2 | 1 |
| AAAUGGAUUUUUGGAAGUAGG      | 10 | 1  | 6  | 0 | 3 |
| UCCUGGUUGCUCUUAUCUGAU      | 10 | 1  | 4  | 1 | 4 |
| AGGGAGGGAACGCAGUCUGAGUGG   | 10 | 3  | 1  | 3 | 3 |
| GAGGCCAGCCUGGGCUACACAUUUU  | 10 | 3  | 1  | 2 | 4 |
| UCGCUGUGAUGAUGGAUUC        | 10 | 2  | 4  | 0 | 4 |
| UCCCAUGAAGAAAUG            | 9  | 6  | 1  | 2 | 0 |
| AAAUGGAUUUUUGGAACUAG       | 9  | 0  | 9  | 0 | 0 |
| UCGCUGUGAUGAUGGAUUCCAA     | 9  | 2  | 5  | 0 | 2 |
| UGAUUGGAAGACACUCUGCAAC     | 9  | 1  | 4  | 4 | 0 |

|                            |   |   |   |   |   |
|----------------------------|---|---|---|---|---|
| UGGAUAUGAUGACUGAUUACCUGAG  | 9 | 3 | 2 | 3 | 1 |
| GAGGCCAGCCUGGGCUACACAUUU   | 9 | 0 | 0 | 3 | 6 |
| UGGAUUUUUGGAACUAG          | 8 | 0 | 7 | 0 | 1 |
| AAAUGGAUUUUUGGAAGUAG       | 8 | 2 | 5 | 0 | 1 |
| ACCACGAGGACGAGACGUAGC      | 8 | 0 | 2 | 4 | 2 |
| UGGAUUUUUGGAAGUAG          | 8 | 0 | 7 | 0 | 1 |
| AUGGAGAGACUUUGACAGCUC      | 7 | 2 | 3 | 2 | 0 |
| UUGCAAUGAUGUCAUCUACUACUG   | 7 | 3 | 1 | 1 | 2 |
| GGUGAAUUGCAGUACUCCAAC      | 7 | 3 | 4 | 0 | 0 |
| UUCUCGGCCUUUUGGCUAAG       | 7 | 1 | 2 | 2 | 2 |
| GAAAUGAUGAUUGGAGCUUGC      | 7 | 0 | 7 | 0 | 0 |
| UAUGGAGGUCUCUGUCUGAC       | 7 | 1 | 3 | 3 | 0 |
| CCAGCCUGGGCUACACAUUUUU     | 7 | 3 | 2 | 2 | 0 |
| GGAGGAUUAUGUGUGACAGA       | 7 | 4 | 2 | 1 | 0 |
| GUCAGAUGAUUUGAAAUGAUGAC    | 7 | 2 | 0 | 2 | 3 |
| CGUUCGCGCUCUCCCU           | 7 | 3 | 1 | 0 | 3 |
| CGAGGCCAGCCUGGGCUACACAUUU  | 7 | 1 | 1 | 1 | 4 |
| AUCCUGGUUGCUCCUAUCUGAU     | 7 | 0 | 1 | 2 | 4 |
| UGGAUUUUUGGAACUAGG         | 7 | 0 | 7 | 0 | 0 |
| UAUGGCUGAGUUGCAAUGAUGU     | 7 | 1 | 1 | 5 | 0 |
| CUGGUUGCUCCUAUCUGAU        | 7 | 1 | 1 | 1 | 4 |
| CGGCGAUGAUGACACUCCA        | 7 | 3 | 2 | 0 | 2 |
| CUACGGGGAUGAUUAUGAA        | 6 | 0 | 3 | 0 | 3 |
| UAUUCAUUUACUCCCCAGCCUA     | 6 | 1 | 2 | 3 | 0 |
| GAAAUGAUGAUUGGAGC          | 6 | 1 | 2 | 0 | 3 |
| AUCUGUGAGGAUAAGUAACUCUGAGG | 6 | 4 | 0 | 2 | 0 |
| ACAUCCUGGUUGCUCCUAUCUGAU   | 6 | 1 | 0 | 0 | 5 |
| CUUCAGUGAUGACACG           | 6 | 0 | 6 | 0 | 0 |
| UCGCUGUGAUGAUGGAUUGCA      | 6 | 0 | 6 | 0 | 0 |
| UGGAUUUUUGGAAGUAGG         | 6 | 0 | 5 | 0 | 1 |

|                            |   |   |   |   |   |
|----------------------------|---|---|---|---|---|
| CUACGGGGAUGAUUAUGAAA       | 6 | 1 | 4 | 0 | 1 |
| GAAAUAUGAUUUGGA            | 6 | 2 | 0 | 1 | 3 |
| AGCCUGGGCUACACAUUU         | 5 | 2 | 1 | 1 | 1 |
| GUUCUGUGAUGAGGCUCUGGAA     | 5 | 1 | 0 | 3 | 1 |
| GUUCUGUGAUGAGGCUCUGG       | 5 | 1 | 1 | 2 | 1 |
| AUGUCUUUCGCUCCUAUCUGAU     | 5 | 1 | 1 | 0 | 3 |
| GAGGCCAGCCUGGGCUACACAUU    | 5 | 0 | 1 | 3 | 1 |
| AUCUGUGAGGAUAAGUAACUCUGAG  | 5 | 1 | 1 | 3 | 0 |
| GUCAUAAGAUUCGGUGCAAUAAG    | 5 | 0 | 4 | 1 | 0 |
| CACCCUGAUGAACUGA           | 5 | 0 | 5 | 0 | 0 |
| UCCCCAUGAAGAAAUG           | 5 | 1 | 2 | 1 | 1 |
| ACAUGUGAUGAGAAAC           | 5 | 2 | 3 | 0 | 0 |
| UGUCAUCUUACUACUGAA         | 5 | 2 | 1 | 1 | 1 |
| UUGGAGUUCAUGCAAGUUCU       | 5 | 1 | 1 | 2 | 1 |
| CGAGGCCAGCCUGGGCUACACAUUUU | 5 | 1 | 0 | 1 | 3 |
| GCGGAUGAUGACACCUUG         | 5 | 1 | 3 | 0 | 1 |
| GCAUAAUUUGUGGUAGUGGG       | 5 | 0 | 5 | 0 | 0 |
| AUGGAGGUCUCUGUCUGACU       | 5 | 2 | 0 | 3 | 0 |
| UUCUGCCAGUCUCCUUCAGAC      | 5 | 1 | 0 | 4 | 0 |
| GAGGGAACGCAGUCUGAGUGG      | 5 | 1 | 0 | 1 | 3 |
| UCGAGGCCAGCCUGGGCUACACAUU  | 5 | 1 | 1 | 1 | 2 |
| CUGGGCUACACAUUUU           | 5 | 2 | 1 | 2 | 0 |
| UGGAGUUCAUGCAAGUUCUAAC     | 5 | 0 | 2 | 3 | 0 |
| CUACGGGGAUGAUUAUGAAA       | 5 | 0 | 4 | 0 | 1 |
| CGGCGAUGAUGACACUCC         | 5 | 2 | 2 | 1 | 0 |
| AGCCUGGGCUACACAUUUU        | 5 | 2 | 1 | 2 | 0 |
| UGGAUUUUUGGAACUAGGA        | 5 | 0 | 4 | 0 | 1 |
| AAGGUAGAUAGAACAGGUC        | 5 | 2 | 1 | 2 | 0 |
| CAUGGAGGUCUCUGUCUGACUU     | 4 | 1 | 2 | 1 | 0 |
| AGGUAGAUAGAACAGGUCUUGU     | 4 | 1 | 0 | 3 | 0 |

|                            |   |   |   |   |   |
|----------------------------|---|---|---|---|---|
| UAAGCAGGAUUUAACUACAAUA     | 4 | 0 | 2 | 2 | 0 |
| CUGGGCUACACAUUUUU          | 4 | 2 | 1 | 1 | 0 |
| GUGGGCACAUUACCCGUCUGAC     | 4 | 0 | 2 | 0 | 2 |
| GAGGGAGGGAACGCAGUCUGAGUGG  | 4 | 1 | 2 | 1 | 0 |
| AACGCAGUCUGAGUGG           | 4 | 1 | 2 | 0 | 1 |
| UCGCUGUGAUGAUGGAUUC        | 4 | 0 | 2 | 0 | 2 |
| UCACAAUGAUGAUGAA           | 4 | 3 | 0 | 1 | 0 |
| CUUAAUGAUGAACAUGUAAA       | 4 | 1 | 1 | 1 | 1 |
| GCCUGGGCUACACAUUU          | 4 | 0 | 2 | 1 | 1 |
| GCUUGUGAUGAGACAUCUC        | 4 | 2 | 1 | 0 | 1 |
| CUCUGUGCUGAAUGUCAAGUUCUGA  | 4 | 2 | 2 | 0 | 0 |
| AAAUGGAUUUUUGGAACUAGG      | 4 | 0 | 3 | 0 | 1 |
| UAAAUGGAUUUUUGGAAGUAG      | 4 | 1 | 1 | 0 | 2 |
| GGAGAGGACACAGUCUGAGUGG     | 4 | 2 | 0 | 1 | 1 |
| CCAGGUUAGUGACAU            | 4 | 1 | 2 | 1 | 0 |
| CAGCCUGGGCUACACAUUUUU      | 4 | 1 | 1 | 1 | 1 |
| UACCAUGAUGAUAACAUA         | 4 | 3 | 0 | 1 | 0 |
| CAUGGAGGUCUCUGUCUGACU      | 4 | 3 | 1 | 0 | 0 |
| CCUGGGCUACACAUUUU          | 4 | 2 | 0 | 2 | 0 |
| GCCAGCCUGGGCUACACAUUUU     | 4 | 2 | 1 | 1 | 0 |
| UCGAGGCCAGCCUGGGCUACACAUUU | 4 | 1 | 0 | 2 | 1 |
| CACGAGGACGAGACGUAGC        | 4 | 2 | 1 | 1 | 0 |
| CACCCUGAUGAACUGAAUACCG     | 4 | 2 | 1 | 0 | 1 |
| AUUGGAGUUCAUGCAAGUUCUA     | 4 | 2 | 2 | 0 | 0 |
| UAAAUGGAUUUUUGGAACUAGG     | 4 | 0 | 1 | 0 | 3 |
| CUUAAUGAUGAACAUG           | 4 | 2 | 2 | 0 | 0 |
| UUGUGGUAGUGGGGGA           | 3 | 1 | 0 | 0 | 2 |
| UACCAUGAUGAUAACAU          | 3 | 0 | 2 | 1 | 0 |
| AGACCUACUUAUCUACCAAC       | 3 | 1 | 0 | 2 | 0 |
| AUUGGAGUUCAUGCAAGUUC       | 3 | 1 | 2 | 0 | 0 |

|                             |   |   |   |   |   |
|-----------------------------|---|---|---|---|---|
| CAACAUCCUGGUUGCUCUCCAUCUGAU | 3 | 0 | 2 | 0 | 1 |
| UGCAUGUGAUGACAUI            | 3 | 1 | 0 | 1 | 1 |
| AUGGCUGAGUUGCAAUGAUGU       | 3 | 0 | 0 | 3 | 0 |
| UUCGGGGUAAGUACUCU           | 3 | 1 | 1 | 1 | 0 |
| AGCUGUGGAGAAAGGUUUUCUGAG    | 3 | 1 | 2 | 0 | 0 |
| AGGUAGAUAGAACAGGUCU         | 3 | 0 | 2 | 1 | 0 |
| CCACGAGGACGAGACGUAGCG       | 3 | 1 | 0 | 1 | 1 |
| UAUUCAUUUACUCCCCAGCCU       | 3 | 0 | 0 | 3 | 0 |
| CCACGAGGACGAGACGU           | 3 | 1 | 1 | 1 | 0 |
| CACAAGUGAUGAGUGACAA         | 3 | 0 | 3 | 0 | 0 |
| AGGCUGUGAUGAUUGGCGC         | 3 | 1 | 2 | 0 | 0 |
| UACGGGGAUGAUUAUGA           | 3 | 0 | 0 | 3 | 0 |
| ACUCUGUGCUGAAUGUCAAGUUCUGA  | 3 | 3 | 0 | 0 | 0 |
| GUCGAUGAUGAGAGCUUUGUUCUGAG  | 3 | 1 | 1 | 1 | 0 |
| CAUGGAGGUCUCUGUCUGAC        | 3 | 2 | 1 | 0 | 0 |
| UGCAGUGUGGAACAUAUAUGAACUGAA | 3 | 1 | 1 | 1 | 0 |
| GUUCGCGCUCUCCCCU            | 3 | 2 | 0 | 1 | 0 |
| AGACACUCUGCAACAUI           | 3 | 1 | 1 | 0 | 1 |
| AAUGGAUUUUUGGAAGUAG         | 3 | 0 | 2 | 0 | 1 |
| UGUUAGUGAUGAUCAAUAAA        | 3 | 0 | 3 | 0 | 0 |
| CUACGGGGAUGAUUAUGAAAACU     | 3 | 0 | 2 | 0 | 1 |
| UGGGCUGAAUGAAAGUAGCCUUUCUG  | 3 | 0 | 1 | 2 | 0 |
| AAAUGGAUUUUUGGAAGUA         | 3 | 0 | 3 | 0 | 0 |
| AUACAUGAUGAUCUCACACAAC      | 3 | 0 | 1 | 0 | 2 |
| CUCACUGAUUACUUGAUGAUAGUA    | 3 | 1 | 0 | 2 | 0 |
| AAGUUUCUCUGACUGUGUAGAG      | 3 | 1 | 2 | 0 | 0 |
| UCUGAUCGUUCACCUCCAUAC       | 3 | 1 | 1 | 1 | 0 |
| CCUAGUGAUGACAAGA            | 3 | 1 | 1 | 1 | 0 |
| CUGAAAUGAAGAGAAU            | 3 | 3 | 0 | 0 | 0 |
| GGAGAGGACACAGUCUGAGUG       | 3 | 0 | 1 | 0 | 2 |

|                           |   |   |   |   |   |
|---------------------------|---|---|---|---|---|
| GGUUGCUCUAUCUGAU          | 3 | 1 | 0 | 0 | 2 |
| UUCGCUGUGAUGAUGG          | 3 | 1 | 1 | 1 | 0 |
| CCCCUAUGAUGAGGACCUU       | 3 | 0 | 2 | 0 | 1 |
| UGGUUGCUCUAUCUGAU         | 3 | 1 | 0 | 0 | 2 |
| UGGAAAUGAUGAAAUAGAG       | 3 | 0 | 3 | 0 | 0 |
| GUUCUGUGAUGAGGCU          | 3 | 2 | 0 | 1 | 0 |
| AUUGGAGUUCAUGCAAGUUCU     | 3 | 1 | 0 | 1 | 1 |
| UCGCUGUGAUGAUGGAUUCCAA    | 3 | 0 | 1 | 0 | 2 |
| ACUCUGUGCUGAAUGUCAAGUUCUG | 3 | 0 | 1 | 1 | 1 |
| UUAAAUGGAUUUUUGGAAGUAG    | 3 | 0 | 2 | 0 | 1 |
| ACUAAAUGAUGAACAAUGUAAA    | 3 | 2 | 0 | 0 | 1 |
| CCUGGGCUACACAUUUUU        | 3 | 0 | 0 | 2 | 1 |
| AUGAGUGAUGACAAGA          | 3 | 1 | 1 | 1 | 0 |
| CUACGGGGAUGAUUAUGAAAACUGA | 3 | 0 | 2 | 1 | 0 |
| GGGCACAUUACCCGUCUGAC      | 3 | 0 | 1 | 0 | 2 |
| CGGCGAUGAUGACACUCCA       | 3 | 0 | 1 | 1 | 1 |
| AUGGAGGUCUCUGUCUGACUU     | 3 | 0 | 0 | 3 | 0 |
| CGUCUGUGAUGUUCUGC         | 3 | 1 | 0 | 1 | 1 |
| UGGAGUUCAUGCAAGUUCUAA     | 3 | 2 | 1 | 0 | 0 |
| UCCCAUGAAGAAAUGU          | 3 | 2 | 0 | 1 | 0 |
| GCUUGUGAUGAGACAU          | 3 | 2 | 1 | 0 | 0 |
| AGCUUGUGAUGAGACA          | 3 | 3 | 0 | 0 | 0 |
| UCACCCUGAUGAACUGAA        | 3 | 1 | 1 | 1 | 0 |
| GGGAGAGGACACAGUCUGAGUG    | 3 | 1 | 0 | 1 | 1 |
| CAGUCUCUACGGAGACU         | 3 | 2 | 0 | 0 | 1 |
| AGGGAACGCAGUCUGAGUGG      | 3 | 1 | 1 | 0 | 1 |
| UUGGAGUUCAUGCAAGUUCUAACCA | 3 | 2 | 0 | 1 | 0 |
| GCUUGUGAUGAGACAUCUCCA     | 3 | 1 | 2 | 0 | 0 |
| CUGGCUGGGGAAAUGACUGG      | 3 | 3 | 0 | 0 | 0 |
| CUAAAUGAUGAACAAU          | 3 | 2 | 1 | 0 | 0 |

|                            |   |   |   |   |   |
|----------------------------|---|---|---|---|---|
| AAUGGAUUUUUGGAAGUAGG       | 3 | 0 | 3 | 0 | 0 |
| UUAAAUGGAUUUUUGGAAGUAGG    | 3 | 0 | 1 | 0 | 2 |
| AGAAAUGAUGAUUGG            | 3 | 0 | 3 | 0 | 0 |
| CAGCAGGCCAGACUCAGACAUG     | 3 | 1 | 1 | 1 | 0 |
| UUCGAGGCCAGCCUGGGCUACACAUU | 3 | 0 | 0 | 3 | 0 |
| CCACGAGGACGAGACG           | 2 | 0 | 1 | 1 | 0 |
| UCGGCUGAUGAUUGCUGUUGAGA    | 2 | 1 | 0 | 1 | 0 |
| ACCUGAGAAAUAUUGAUGAAA      | 2 | 0 | 0 | 2 | 0 |
| UAGCAUGGCCCCUGCGCAAGGA     | 2 | 1 | 0 | 0 | 1 |
| GGAU AUGAUGACUGAUUACCUGAG  | 2 | 0 | 2 | 0 | 0 |
| UAUGGAGGUCUCUGUCUGACUU     | 2 | 0 | 1 | 1 | 0 |
| UGGGCUACACAUUUUUU          | 2 | 2 | 0 | 0 | 0 |
| GGAGGAUUAUGUGUGACAGACAC    | 2 | 1 | 1 | 0 | 0 |
| CUGGGCUACACAUUUUUU         | 2 | 1 | 1 | 0 | 0 |
| GGAGGGAACGCAGUCUGAGUG      | 2 | 0 | 0 | 2 | 0 |
| UGAAAUGAUGACACUGA          | 2 | 1 | 0 | 0 | 1 |
| CUUAAUGAUGAACAAUGUA        | 2 | 0 | 2 | 0 | 0 |
| AUUACCUGAGAAAUAUUGAUGAAA   | 2 | 1 | 0 | 1 | 0 |
| AUCACUGACGACUCCAUGUGUCUGAG | 2 | 0 | 2 | 0 | 0 |
| UACAGAGAAGAUUAGCAUGGC      | 2 | 1 | 1 | 0 | 0 |
| GCAUAAUUUGUGGUAGUG         | 2 | 0 | 2 | 0 | 0 |
| UAAUUUGUGGUAGUGGGGGA       | 2 | 1 | 0 | 0 | 1 |
| UUUGUGGUAGUGGGGGA          | 2 | 0 | 0 | 0 | 2 |
| UGGAUUUUUGGAAGUAGGA        | 2 | 0 | 2 | 0 | 0 |
| AUGGAGGUCUCUGUCUGAC        | 2 | 0 | 1 | 1 | 0 |
| CGGCGAUGAUGACACUCCAUAACA   | 2 | 1 | 1 | 0 | 0 |
| CCGGGUGAUGCGAAUCGUAAUCUGA  | 2 | 0 | 0 | 1 | 1 |
| ACAUGUGAUGAGAAACUG         | 2 | 0 | 2 | 0 | 0 |
| UGGAAAUGAUGAAAUAG          | 2 | 0 | 2 | 0 | 0 |
| UACGGGGAUGAUAUGAAAACUG     | 2 | 0 | 1 | 1 | 0 |

|                            |   |   |   |   |   |
|----------------------------|---|---|---|---|---|
| AGCUUGUGAUGAGACAU          | 2 | 1 | 0 | 1 | 0 |
| UCGCUGUGAUGAUGGAUUCCAAACC  | 2 | 0 | 0 | 1 | 1 |
| UGAUUGGAAGACACUCUG         | 2 | 0 | 2 | 0 | 0 |
| UGCAUGUGAUGACAUUAUU        | 2 | 0 | 1 | 1 | 0 |
| CCCAGGGCGAGGCUCACCCA       | 2 | 0 | 2 | 0 | 0 |
| CUGUCUGAGUCUCAGAGAUGACA    | 2 | 2 | 0 | 0 | 0 |
| UCAAGUGUAGUAUCUGUU         | 2 | 0 | 2 | 0 | 0 |
| GCCUGGGCUACACAUUUU         | 2 | 0 | 0 | 1 | 1 |
| UACGGGGAUGAUUAUGAA         | 2 | 1 | 1 | 0 | 0 |
| GCGGAUGAUGACACCUGGGU       | 2 | 0 | 2 | 0 | 0 |
| UCACAAUGAUGAUGAAU          | 2 | 1 | 0 | 1 | 0 |
| AAGUGUAGUAUCUGUUC          | 2 | 2 | 0 | 0 | 0 |
| UUCCCCAUGAAGAAAUGU         | 2 | 1 | 1 | 0 | 0 |
| UCACAAUGAUGAUGAAUGGUC      | 2 | 0 | 1 | 1 | 0 |
| AGCCUGGGCUACACAUU          | 2 | 0 | 0 | 1 | 1 |
| CAGCCUGGGCUACACAUUUUUA     | 2 | 0 | 0 | 2 | 0 |
| GCCUCCUGCCAUGAUGAUCGUUC    | 2 | 2 | 0 | 0 | 0 |
| UGCAUAAUUUGUGGUAGUGG       | 2 | 0 | 2 | 0 | 0 |
| UACUUGAUGAUAGUAAAAGAUCUGAU | 2 | 1 | 1 | 0 | 0 |
| CGGCGAUGAUGACACUCCAUAUAG   | 2 | 0 | 0 | 2 | 0 |
| UGGUGCAAUUUUUGGAAA         | 2 | 1 | 0 | 1 | 0 |
| GAUAACUGACGAUAACUG         | 2 | 1 | 1 | 0 | 0 |
| UGAAUUGCAGUACUCCAAC        | 2 | 0 | 2 | 0 | 0 |
| AUAUGGAGGUCUCUGUCUGACUU    | 2 | 2 | 0 | 0 | 0 |
| GAAAUGAUGAUUGGAGCU         | 2 | 1 | 1 | 0 | 0 |
| UCGACUGCAUAAUUUGUGGUAGUGG  | 2 | 0 | 2 | 0 | 0 |
| GAGGCCAGCCUGGGCUACACAUUUUU | 2 | 0 | 0 | 0 | 2 |
| UUACCUGAGAAAUAUUGAUGAAA    | 2 | 1 | 0 | 0 | 1 |
| AUUGGAGUUCAUGCAAGUUCUAAC   | 2 | 1 | 1 | 0 | 0 |
| UUAAAAUAAAGUUUUUUU         | 2 | 0 | 0 | 0 | 2 |

|                           |   |   |   |   |   |
|---------------------------|---|---|---|---|---|
| AGAUCAAGUGUAGUAUCUGUU     | 2 | 1 | 1 | 0 | 0 |
| UACAUGCACUACCAUCUGAG      | 2 | 2 | 0 | 0 | 0 |
| GAGAGGACACAGUCUGAGUGG     | 2 | 0 | 1 | 1 | 0 |
| GUCAGAUGAUUUGAAAUGAUG     | 2 | 1 | 0 | 1 | 0 |
| GAUUCGGUGCAAUAAG          | 2 | 0 | 0 | 2 | 0 |
| GUACAUGAUGAAAACAGUCUC     | 2 | 0 | 1 | 0 | 1 |
| ACUUAUGAUGAACAAUG         | 2 | 1 | 1 | 0 | 0 |
| AGUCCUGGUGUCUGAG          | 2 | 1 | 0 | 1 | 0 |
| GCCUGGGCUACACAUUUUU       | 2 | 1 | 0 | 1 | 0 |
| AUGAGUGAUGACAAGAUGUUUCGGU | 2 | 0 | 0 | 1 | 1 |
| UUCAGUGAUGACACGAUGACGA    | 2 | 0 | 1 | 1 | 0 |
| CUUAAUGAUGAACAAUGUAAA     | 2 | 1 | 1 | 0 | 0 |
| GCGGAUGAUGACACCGGGUA      | 2 | 0 | 0 | 0 | 2 |
| UGGAUAUGAUGACUGA          | 2 | 0 | 2 | 0 | 0 |
| UCCGAUCGUUCCCCUCCAUACA    | 2 | 1 | 0 | 1 | 0 |
| UGCAUGUGAUGACAUUA         | 2 | 0 | 0 | 1 | 1 |
| UCUGAUCGUUCACCUCCA        | 2 | 0 | 2 | 0 | 0 |
| CUCACUGAUUACUUGAUGAUA     | 2 | 0 | 2 | 0 | 0 |
| UCAGAUGAUUUGAAAUGAUG      | 2 | 1 | 0 | 1 | 0 |
| GUUAGUGAUGAUCAAUAAGUU     | 2 | 0 | 1 | 1 | 0 |
| UGUUGCCUUCUUCUGA          | 2 | 0 | 0 | 1 | 1 |
| UGUACUGAUUAUCUGUGAGGAUA   | 2 | 1 | 1 | 0 | 0 |
| UGUUGUCGUUCCCCUGCUC       | 2 | 0 | 0 | 2 | 0 |
| CUCGUACAUGGUCUAGACAUU     | 2 | 1 | 0 | 1 | 0 |
| UACAUGUGAUGAAGCAA         | 2 | 0 | 1 | 1 | 0 |
| CUAGGGUGAUGAAAACGU        | 2 | 0 | 1 | 0 | 1 |
| GAUCAAGUGUAGUAUCUGU       | 2 | 0 | 0 | 2 | 0 |
| UUAAAUGGAUUUUUGGAACUAG    | 2 | 0 | 1 | 0 | 1 |
| CACCCUGAUGAACUGAAUA       | 2 | 2 | 0 | 0 | 0 |
| AAUAUAAGAGUUCGGU          | 2 | 1 | 1 | 0 | 0 |

|                           |   |   |   |   |   |
|---------------------------|---|---|---|---|---|
| AGGCCAGCCUGGGCUACACAUI    | 2 | 1 | 0 | 1 | 0 |
| UGAUUGGAAGACACUCUGCAA     | 2 | 0 | 2 | 0 | 0 |
| UUGCUGUGAUGACUAUCU        | 2 | 0 | 1 | 1 | 0 |
| CUCGCUGUGAUGAUGG          | 2 | 1 | 0 | 0 | 1 |
| AAUUUUUUGAGGCCUUGUC       | 2 | 0 | 0 | 2 | 0 |
| GUUAGUGAUGAUCAAUAAAGU     | 2 | 0 | 1 | 0 | 1 |
| UGAAUUGCAGUACUCCAACA      | 2 | 0 | 2 | 0 | 0 |
| AACAUGUGAUGAGAAACU        | 2 | 1 | 1 | 0 | 0 |
| GCUUGUGAUGAGACAUC         | 2 | 0 | 0 | 0 | 2 |
| AAUGAUGUCAUCUACUACUGAA    | 2 | 1 | 1 | 0 | 0 |
| UAGCUGUGGAGAAAGGUUUUCUGA  | 2 | 1 | 0 | 1 | 0 |
| AGGACACAGUCUGAGUGG        | 2 | 0 | 1 | 1 | 0 |
| AUAUGGCUGAGUUCAAUGAUGU    | 2 | 1 | 1 | 0 | 0 |
| UUACCUGAGAAAUAAUUGAUGAAAU | 2 | 0 | 1 | 1 | 0 |
| GACACUCUGCAACAUI          | 2 | 2 | 0 | 0 | 0 |
| GAAGAAUUUUUGAGCGGGU       | 2 | 0 | 2 | 0 | 0 |
| CUCGGUGAUGAGAACUUI        | 2 | 1 | 0 | 0 | 1 |
| GUUCCAGAAGGAACUGUCUGAGGG  | 2 | 1 | 0 | 1 | 0 |
| GAACGCAGUCUGAGUGG         | 2 | 1 | 0 | 1 | 0 |
| UCGCUGUGAUGAUGGAUUCCAAAA  | 2 | 0 | 0 | 2 | 0 |
| GCUUGUGAUGAGACAUCUCCCAC   | 2 | 1 | 0 | 0 | 1 |
| GCUUGUGAUGAGACAUCU        | 2 | 1 | 1 | 0 | 0 |
| UUGGAGUUCAUGCAAGUUCUA     | 2 | 2 | 0 | 0 | 0 |
| GAGAGAAUCUAAAAGACUGAG     | 2 | 0 | 0 | 2 | 0 |
| UGUUGCCUCCUUCUG           | 2 | 0 | 2 | 0 | 0 |
| AGGCUGUGAUGAUUGGCGCAGGGG  | 2 | 1 | 0 | 1 | 0 |
| CACCCUGAUGAACUGAAUACC     | 2 | 1 | 0 | 0 | 1 |
| AAGGUAGAUAGAACAGG         | 2 | 0 | 0 | 2 | 0 |
| AAUUUGUGGUAGUGGGGG        | 2 | 1 | 0 | 1 | 0 |
| GCGGAUAUGGGACUGAGACC      | 2 | 0 | 0 | 2 | 0 |

|                            |   |   |   |   |   |
|----------------------------|---|---|---|---|---|
| UAAUUUGUGGUAGUGGGG         | 2 | 0 | 0 | 1 | 1 |
| UGUUAGUGAUGAUCAAUAA        | 2 | 0 | 2 | 0 | 0 |
| UCACCCUGAUGAACUGAAUACCG    | 2 | 0 | 1 | 1 | 0 |
| CCCCUAUGAUGAGGACCUUU       | 2 | 0 | 0 | 1 | 1 |
| GUGCAGUGAUGUGUGAA          | 2 | 1 | 0 | 1 | 0 |
| AGGCCAGCCUGGGCUACACAUUU    | 2 | 0 | 0 | 2 | 0 |
| UGCCCGAUGAUUAUAAAAAG       | 2 | 0 | 0 | 1 | 1 |
| CUACGGGAUGAUUAUGAAAACUG    | 2 | 0 | 2 | 0 | 0 |
| AAUGGAUUUUUGGAAGUA         | 2 | 0 | 2 | 0 | 0 |
| UCACCCUGAUGAACUGA          | 2 | 0 | 2 | 0 | 0 |
| AUCGCUUCUCGGCCUUUUGGC      | 2 | 0 | 1 | 1 | 0 |
| CACAAGUGAUGAGUGACA         | 2 | 0 | 2 | 0 | 0 |
| AAUACAUGAUGAUCUCAC         | 2 | 0 | 2 | 0 | 0 |
| GCGGAUGAUGACACCUGGGUAUG    | 2 | 0 | 1 | 0 | 1 |
| UGAAAUGAUGACACUGAA         | 2 | 1 | 0 | 1 | 0 |
| CUUUCGCUCCUAUCUGAU         | 2 | 0 | 1 | 1 | 0 |
| CCCAUGCACCGCUCUGAGAC       | 2 | 1 | 0 | 0 | 1 |
| CGAGGCCAGCCUGGGCUACACAUU   | 2 | 0 | 0 | 2 | 0 |
| UGAUGUCAUCUUACUACUGAA      | 2 | 2 | 0 | 0 | 0 |
| AAUUUGUGGUAGUGGG           | 2 | 0 | 0 | 2 | 0 |
| ACUGCAUAAUUUGUGGUAGUGG     | 2 | 0 | 2 | 0 | 0 |
| GGUGAAUUGCAGUACUCCAACA     | 2 | 0 | 2 | 0 | 0 |
| GACUGCAUAAUUUGUGGUAGUGGG   | 1 | 0 | 1 | 0 | 0 |
| GUUCUGUGAUGAGGCUCUG        | 1 | 0 | 0 | 1 | 0 |
| CGACUGCAUAAUUUGUGGUAGUG    | 1 | 1 | 0 | 0 | 0 |
| ACCUCCAGGAACGGUGCA         | 1 | 0 | 0 | 1 | 0 |
| AGUGCUGGGAUUAAAGG          | 1 | 1 | 0 | 0 | 0 |
| AGUACCUCCAGGAACGGUGC       | 1 | 0 | 0 | 1 | 0 |
| CGUGUGUGUGUGUGUGUGU        | 1 | 1 | 0 | 0 | 0 |
| CAGCCACCCGCCACUGCACCUGACCA | 1 | 1 | 0 | 0 | 0 |

|                            |   |   |   |   |   |
|----------------------------|---|---|---|---|---|
| UAUGGCUGAGUUGCAAUGAUG      | 1 | 0 | 0 | 1 | 0 |
| UACGGGGAUGAUUAUGAAAAC      | 1 | 1 | 0 | 0 | 0 |
| UUGCUGUGGACAUGACCAUAAA     | 1 | 1 | 0 | 0 | 0 |
| AGGUAGAUAGAACAGGUC         | 1 | 1 | 0 | 0 | 0 |
| GAUAUGAUGACUGAUUACCUGAGAA  | 1 | 0 | 1 | 0 | 0 |
| UGCCAAUGAUGACACC           | 1 | 0 | 0 | 1 | 0 |
| UGCAGAUGAUGUGACAGA         | 1 | 0 | 0 | 0 | 1 |
| CAAGUGUAGUAUCUGU           | 1 | 0 | 1 | 0 | 0 |
| GAUUGGAAGACACUCUGCAACAUU   | 1 | 0 | 0 | 1 | 0 |
| GGCCAGACUCAGACAUG          | 1 | 0 | 0 | 1 | 0 |
| GGGAGAUGAAGAGGACAGUGACUG   | 1 | 0 | 0 | 1 | 0 |
| CCCCUGCGCAAGGAUGACAC       | 1 | 0 | 1 | 0 | 0 |
| UCCCAGGGCGAGGCUCACCCA      | 1 | 1 | 0 | 0 | 0 |
| GGUCACAGUGUCCCUCUUA        | 1 | 0 | 0 | 0 | 1 |
| AUGGAUUUUUGGAAGUAGGA       | 1 | 1 | 0 | 0 | 0 |
| UGCAGUGAUGUGUGAAUU         | 1 | 0 | 1 | 0 | 0 |
| CACUGUGCUGACACUCACAUUGCUGA | 1 | 0 | 0 | 0 | 1 |
| CUUAAUGAUGAACAAUGU         | 1 | 0 | 0 | 1 | 0 |
| CUACAUGCACUACCAUCUGAG      | 1 | 1 | 0 | 0 | 0 |
| CAUAAUUUGUGGUAGUGGG        | 1 | 1 | 0 | 0 | 0 |
| UGCAGAUGAUGUGACAGAA        | 1 | 0 | 1 | 0 | 0 |
| UCAUGACGACAAAUUUAAUUCUGAG  | 1 | 0 | 1 | 0 | 0 |
| CACGAGUUCGAGGCCAGCCUGGGCU  | 1 | 1 | 0 | 0 | 0 |
| AUCCUCACAGUCCCCAGGAA       | 1 | 1 | 0 | 0 | 0 |
| GCCGGUAGUGGUGGCGC          | 1 | 0 | 0 | 0 | 1 |
| CUGCUAGAACCUCAA            | 1 | 0 | 1 | 0 | 0 |
| AACUCAAUCGGUGUUGUGACAAG    | 1 | 0 | 1 | 0 | 0 |
| GGGGAGAUACCAUGAUC          | 1 | 0 | 1 | 0 | 0 |
| GGUCGAUGAUGAGAGCUUUG       | 1 | 1 | 0 | 0 | 0 |
| GUGCAAUUUUUGGAAAA          | 1 | 1 | 0 | 0 | 0 |

|                           |   |   |   |   |   |
|---------------------------|---|---|---|---|---|
| UCCAACGUGGAUAUCCCGGGAG    | 1 | 1 | 0 | 0 | 0 |
| UGGUAGUGGGGGACUGCGU       | 1 | 1 | 0 | 0 | 0 |
| ACCUCCAGGAACGGUGCACC      | 1 | 1 | 0 | 0 | 0 |
| UAGGAUUUGCUGAAGGAGGCAGA   | 1 | 1 | 0 | 0 | 0 |
| UGCAUAAUUUGUGGUAGUGGG     | 1 | 0 | 1 | 0 | 0 |
| GAACCUGAAUCCUGUUGAAAAA    | 1 | 0 | 1 | 0 | 0 |
| CACCCUGGGGUCUGAGGGG       | 1 | 0 | 1 | 0 | 0 |
| GUGCAAUUUUUGGAAA          | 1 | 1 | 0 | 0 | 0 |
| ACCAAGAUGAGUGGUGCAAUCUGA  | 1 | 0 | 0 | 1 | 0 |
| GAGGACACAGUCUGAGUGG       | 1 | 0 | 0 | 1 | 0 |
| UUGGAUGUCUGAGUGA          | 1 | 0 | 1 | 0 | 0 |
| AUGGCCCCUGCGCAAGGAUG      | 1 | 0 | 0 | 0 | 1 |
| CAAAAUGUGCUCUCAUGGUCAAG   | 1 | 1 | 0 | 0 | 0 |
| UGGUAGUGGGGGACUGC         | 1 | 0 | 0 | 1 | 0 |
| AUGCAAUGAUGAGCGA          | 1 | 0 | 0 | 1 | 0 |
| CGGCGAUGAUGACACUCCAUAUA   | 1 | 0 | 0 | 1 | 0 |
| CAGCCUGGGCUACACAUUUAA     | 1 | 0 | 1 | 0 | 0 |
| AAUCUGCCUGCCUCUGCCU       | 1 | 0 | 0 | 1 | 0 |
| UCUUUCUGAUGGUUUAGUGGAGAAA | 1 | 1 | 0 | 0 | 0 |
| GCAUAAUUUGUGGUAGUGGGG     | 1 | 0 | 1 | 0 | 0 |
| UGGAACGAUACAGAGAAGAUUAG   | 1 | 0 | 1 | 0 | 0 |
| UAGUGUGCUUAAGUCCUCGAA     | 1 | 1 | 0 | 0 | 0 |
| GGUGAAUUGCAGUACUCCAA      | 1 | 0 | 1 | 0 | 0 |
| UACCAACGAUUCUGAU          | 1 | 1 | 0 | 0 | 0 |
| GGACACAGUCUGAGUGG         | 1 | 0 | 0 | 0 | 1 |
| AAGAUCAAGUGUAGUAUCUGUU    | 1 | 1 | 0 | 0 | 0 |
| AAUGGAUUUUUGGAAGUAGGAG    | 1 | 1 | 0 | 0 | 0 |
| AGGCCAGCCUGGGCUACACA      | 1 | 0 | 1 | 0 | 0 |
| UCCACGCAUCGACCUGGU        | 1 | 0 | 1 | 0 | 0 |
| GAGGUCUCUGUCUGACU         | 1 | 1 | 0 | 0 | 0 |

|                            |   |   |   |   |   |
|----------------------------|---|---|---|---|---|
| AAAUGGAUUUUUGGAACUA        | 1 | 0 | 1 | 0 | 0 |
| GCGGAUGAUGACACCUGGGUAUGCU  | 1 | 0 | 0 | 0 | 1 |
| UGGAUUUUUGGAAGUAGGAG       | 1 | 1 | 0 | 0 | 0 |
| UUGGAGUUCAUGCAAG           | 1 | 1 | 0 | 0 | 0 |
| UCAGAUGAUUUGAAAUGAUGACACUG | 1 | 1 | 0 | 0 | 0 |
| GUUAAAGGCUAGGCUCACA        | 1 | 1 | 0 | 0 | 0 |
| UAGUGGUGAGCCUAUGGUUUUCUGAA | 1 | 1 | 0 | 0 | 0 |
| AAUGGAUUUUUGGAACUAG        | 1 | 0 | 1 | 0 | 0 |
| AACACAGGAACACCUGAG         | 1 | 0 | 1 | 0 | 0 |
| UUUAAUAUCUGAUACGUCCU       | 1 | 1 | 0 | 0 | 0 |
| GUCAAUGAUGUGUUGG           | 1 | 0 | 1 | 0 | 0 |
| UGCCAGUGAUGCUUAGGAA        | 1 | 1 | 0 | 0 | 0 |
| CCAUGCAGGAAACAGU           | 1 | 0 | 1 | 0 | 0 |
| CACAAGUGAUGAGUGACAAAGGGA   | 1 | 0 | 1 | 0 | 0 |
| AAUUCCUGUUGAAAAACCAU       | 1 | 1 | 0 | 0 | 0 |
| GUUAGUGAUGAUCAAUAAAG       | 1 | 0 | 0 | 1 | 0 |
| UUCUGUGAUGAGGCUCUGGA       | 1 | 0 | 1 | 0 | 0 |
| AUACAUGAUGAUCUCACACAACUUGA | 1 | 0 | 1 | 0 | 0 |
| AGCUGAGGAUGAUUUAAAG        | 1 | 0 | 1 | 0 | 0 |
| UCUGUGCUGAAUGUCAAGUUCUGAU  | 1 | 0 | 1 | 0 | 0 |
| AUAUAAGAGUUCGGUCC          | 1 | 0 | 0 | 0 | 1 |
| AUUGGAGCUUGCAUGAU          | 1 | 0 | 0 | 0 | 1 |
| GCAGUCUGCCUUUCUU           | 1 | 1 | 0 | 0 | 0 |
| UGCCAGUGAUGCUUAGGA         | 1 | 0 | 0 | 0 | 1 |
| GUUCAAUUCCCAGCAACCACAUG    | 1 | 0 | 0 | 0 | 1 |
| ACCACGAGGACGAGACG          | 1 | 0 | 0 | 0 | 1 |
| GGGGAUGAUUAUGAAA           | 1 | 1 | 0 | 0 | 0 |
| UCUAAGUGAGGAUGAAGUUAUCUGAG | 1 | 0 | 0 | 1 | 0 |
| AGACCUACUUAUCUACCAACAGC    | 1 | 0 | 0 | 1 | 0 |
| AAGCGUGAUGAUUGGG           | 1 | 1 | 0 | 0 | 0 |

|                           |   |   |   |   |   |
|---------------------------|---|---|---|---|---|
| AGUGUAGUAUCUGUUCUUAUCAGU  | 1 | 0 | 0 | 0 | 1 |
| UCCCCUUGACAAGGAUGGAAGA    | 1 | 0 | 0 | 1 | 0 |
| UAGCCAAUGAGGUUUAUCCGAGGCG | 1 | 0 | 1 | 0 | 0 |
| UAAGAUUCGGUGCAAUAAG       | 1 | 0 | 0 | 0 | 1 |
| GAAGAGGACAGUGACUGAGAG     | 1 | 0 | 0 | 1 | 0 |
| UGCUCUGAAUGGGCUGAAUGAAAG  | 1 | 0 | 1 | 0 | 0 |
| CACCCUGAUGAACUGAAUAC      | 1 | 0 | 0 | 0 | 1 |
| GUUAGAGUUCUGAUGGC         | 1 | 0 | 0 | 1 | 0 |
| ACAACUGAGCUUGUUGAUGAAUAC  | 1 | 0 | 0 | 1 | 0 |
| ACCAAGAUCGCUGAUGCA        | 1 | 0 | 0 | 0 | 1 |
| AAAUGGAUUUUUGGAAGUAGGAG   | 1 | 0 | 1 | 0 | 0 |
| CGAUGAUGACACUCCA          | 1 | 0 | 1 | 0 | 0 |
| CUCACUGAUUACUUGAUGAUAGU   | 1 | 1 | 0 | 0 | 0 |
| CGCGGAUGAUGACACCUGG       | 1 | 0 | 0 | 0 | 1 |
| GUACAUGAUGAAAACAGUCUCCCU  | 1 | 0 | 1 | 0 | 0 |
| CAUCGACCUGGUAUUGCAGUACCUC | 1 | 0 | 0 | 0 | 1 |
| GGCCAGCCUGGGCUACACAUUUU   | 1 | 0 | 0 | 1 | 0 |
| AUCGUAUUCUGAGCCG          | 1 | 1 | 0 | 0 | 0 |
| AGUUUCUCUGACUGUGUAGAGCAC  | 1 | 0 | 1 | 0 | 0 |
| UCACCCAUGACUGAUGGC        | 1 | 0 | 1 | 0 | 0 |
| AGGUAGAUAGAACAGGU         | 1 | 1 | 0 | 0 | 0 |
| AUGGAUUUUUGGAAGUAGGAGUU   | 1 | 1 | 0 | 0 | 0 |
| CAGCUGAGUGUUUCUUGAAGAG    | 1 | 1 | 0 | 0 | 0 |
| AUUUGCAGUAACAGGUGUGAG     | 1 | 0 | 0 | 1 | 0 |
| GACAACUGAGCUUGUUGAUGAAU   | 1 | 0 | 0 | 0 | 1 |
| CACAAGUGAUGAGUGA          | 1 | 0 | 1 | 0 | 0 |
| UUCUGACUUCGGUCGG          | 1 | 0 | 1 | 0 | 0 |
| UUAAAGGCUAGGCUCACAACCAAAA | 1 | 0 | 0 | 1 | 0 |
| UCACAAUGAUGAUGAAUG        | 1 | 0 | 1 | 0 | 0 |
| CGGAUGUGCUGACCCCUGCG      | 1 | 0 | 0 | 1 | 0 |

|                             |   |   |   |   |   |
|-----------------------------|---|---|---|---|---|
| CCACGAGGAGGAGACAGAGUG       | 1 | 0 | 0 | 0 | 1 |
| UUCGAGACAGGGUUUCUCUG        | 1 | 0 | 1 | 0 | 0 |
| UCACUUUGUAGACCAGG           | 1 | 0 | 1 | 0 | 0 |
| CCACGAGGACGAGACGUA          | 1 | 1 | 0 | 0 | 0 |
| UCCAUUGCACUCCGGAU           | 1 | 0 | 0 | 0 | 1 |
| ACUUAUGAUGAACAA             | 1 | 0 | 1 | 0 | 0 |
| CUCGGUGAUGAGAACUUU          | 1 | 1 | 0 | 0 | 0 |
| CGGCGAUGAUGACACUCCAUA       | 1 | 0 | 1 | 0 | 0 |
| AGAAGAAUUUUUGAGCGGGU        | 1 | 0 | 1 | 0 | 0 |
| GGAGGAUU AUGUGUGACAGACACA   | 1 | 1 | 0 | 0 | 0 |
| GCCAGCCUGGGCUACACAUUUUU     | 1 | 0 | 0 | 1 | 0 |
| AAUACAUGAUGAUCUCACAC        | 1 | 1 | 0 | 0 | 0 |
| UACGGGGAUGAU AUGAAA         | 1 | 1 | 0 | 0 | 0 |
| CCAAAUGC GGGAAACUCGACUGCAUA | 1 | 0 | 0 | 1 | 0 |
| UGGCAAUUUUUGACAGU           | 1 | 0 | 1 | 0 | 0 |
| GAAAAUGAUGAUUGGAGCUUGCA     | 1 | 0 | 1 | 0 | 0 |
| AUUAAAUGGAAUUUUUGGAACUAGG   | 1 | 0 | 1 | 0 | 0 |
| UCAAGUGUAGUAUCUGUUCUUA      | 1 | 0 | 1 | 0 | 0 |
| CCGUUAAAGGCUAGGCUCACA       | 1 | 1 | 0 | 0 | 0 |
| GUUCGGUUCCCAGCACCCA         | 1 | 1 | 0 | 0 | 0 |
| ACUUAUGAUGAACA AU           | 1 | 1 | 0 | 0 | 0 |
| AUACAUGAUGAUCUCACACAACU     | 1 | 1 | 0 | 0 | 0 |
| AAAACACAGGAACACCUGAGAAA     | 1 | 0 | 0 | 1 | 0 |
| UGGCUGAGUUGCAAUGAUGUC       | 1 | 0 | 1 | 0 | 0 |
| AUCACCCAUGACUGAUGGCU        | 1 | 1 | 0 | 0 | 0 |
| CGUGAAGCCGGCUCUAGGUG        | 1 | 0 | 1 | 0 | 0 |
| UGGAGUUCAUGCAAGUUCUAACC     | 1 | 0 | 1 | 0 | 0 |
| AAUGGAUUUUUGGAAGUAGGAGU     | 1 | 1 | 0 | 0 | 0 |
| UUCGUUACUAGAGAAGU           | 1 | 0 | 0 | 0 | 1 |
| AAGUGCUGGGAUUAAA            | 1 | 0 | 0 | 0 | 1 |

|                           |   |   |   |   |   |
|---------------------------|---|---|---|---|---|
| UCAAAGGAACCACUGAUGC       | 1 | 0 | 1 | 0 | 0 |
| GGUAUUGAUGACUGAUUACCUGAGA | 1 | 0 | 1 | 0 | 0 |
| AUAACUAUCCUCUGAGCA        | 1 | 0 | 0 | 1 | 0 |
| CACGAGUUCGAGGCCAGCCUGG    | 1 | 1 | 0 | 0 | 0 |
| ACACACACACACACACACAU      | 1 | 1 | 0 | 0 | 0 |
| CUUCAGUGAUGACACGAUGA      | 1 | 1 | 0 | 0 | 0 |
| UACUAAAGAUUCCGUGGAGAGGAA  | 1 | 0 | 1 | 0 | 0 |
| AUACCAUGAUGAUAAAUAGUUCA   | 1 | 0 | 0 | 0 | 1 |
| AGGAGGAUCACGAGUUCGAGGCC   | 1 | 0 | 1 | 0 | 0 |
| GUACAUGAUGAAAACAG         | 1 | 1 | 0 | 0 | 0 |
| UUGGAGUUCAUGCAAGU         | 1 | 1 | 0 | 0 | 0 |
| UGUUAGUGAUGAUCAAUAAAGUU   | 1 | 1 | 0 | 0 | 0 |
| AAAGGUAUUUUCUGAG          | 1 | 0 | 1 | 0 | 0 |
| CCUGCGCAAGGAUGACACGCA     | 1 | 0 | 1 | 0 | 0 |
| AGCAUGGCCCCUGCGCAAGG      | 1 | 0 | 0 | 0 | 1 |
| AAUUUGUGGUAGUGGGGGA       | 1 | 1 | 0 | 0 | 0 |
| UUCGCUGUGAUGAUGGAUU       | 1 | 0 | 1 | 0 | 0 |
| UCUCGGUGAUGAGAACUU        | 1 | 0 | 0 | 0 | 1 |
| GAUUUUUGGAACUAGGAGUUGGAA  | 1 | 0 | 0 | 0 | 1 |
| ACCAGGUUAGUGACAU          | 1 | 0 | 0 | 0 | 1 |
| CGAGGCCAGCUUGGGCUACACAUUU | 1 | 0 | 0 | 1 | 0 |
| UUAGAGUUCUGAUGGC          | 1 | 0 | 1 | 0 | 0 |
| UUUUAACCCUGAGCAA          | 1 | 0 | 1 | 0 | 0 |
| UGUUAGUGAUGAUCAAU         | 1 | 0 | 1 | 0 | 0 |
| AUGAGUGAUGACAAGAUG        | 1 | 0 | 1 | 0 | 0 |
| ACUUGAUGAUAGUAAAAGAUCUGAU | 1 | 0 | 1 | 0 | 0 |
| AUAUGGAGGUCUCUGUCUGAC     | 1 | 1 | 0 | 0 | 0 |
| UUUCUAUGAUGAAUCAAC        | 1 | 0 | 1 | 0 | 0 |
| ACUAAAGAUUCCGUGGAGAGGAA   | 1 | 0 | 0 | 0 | 1 |
| CUGCAUAAUUUGUGGUAGUGG     | 1 | 0 | 1 | 0 | 0 |

|                            |   |   |   |   |   |
|----------------------------|---|---|---|---|---|
| AGCCCAUGAUGGUAUGAGAGU      | 1 | 0 | 0 | 0 | 1 |
| CUCGGUGAUGAGAACUUUGU       | 1 | 0 | 1 | 0 | 0 |
| ACAUCUGUCACCCCAUUGAUCG     | 1 | 0 | 1 | 0 | 0 |
| GCAUAAUUUUUUGGUAUU         | 1 | 0 | 1 | 0 | 0 |
| UACGGGGAUGAUUGAAAACU       | 1 | 0 | 1 | 0 | 0 |
| AGUUUCUCUGACUGUGUA         | 1 | 0 | 1 | 0 | 0 |
| ACUAAUUGCCAGUUUUGUCUGAU    | 1 | 0 | 0 | 0 | 1 |
| ACCACGAGGAGGAGAC           | 1 | 0 | 1 | 0 | 0 |
| CUACGGGGAUGAUUGAAAACUGAA   | 1 | 0 | 0 | 1 | 0 |
| GCACAUUACCCGUCUGAC         | 1 | 0 | 0 | 0 | 1 |
| AGUUCGUUACUAGAGAAGUUUCUCUG | 1 | 0 | 1 | 0 | 0 |
| GAGUGGUGCAAUCUGAU          | 1 | 0 | 1 | 0 | 0 |
| GCAGAUGAUGUGACAGAA         | 1 | 0 | 0 | 0 | 1 |
| CGAGGCCAGCCUGGGCUACAC      | 1 | 0 | 1 | 0 | 0 |
| UUGUGGUAGUGGGGGAGC         | 1 | 1 | 0 | 0 | 0 |
| CUGGCUGGGGAAAUGACUGGA      | 1 | 1 | 0 | 0 | 0 |
| AAUACAUGAUGAUCUCA          | 1 | 0 | 0 | 0 | 1 |
| AUAACUAUCCUCUGAGCAG        | 1 | 0 | 0 | 1 | 0 |
| UCACAACCAAAAUAUAAGAGUUC    | 1 | 1 | 0 | 0 | 0 |
| AUACUUACCGGCAGGGGAGA       | 1 | 0 | 1 | 0 | 0 |
| GGAUCACGAGUUCGAGG          | 1 | 0 | 1 | 0 | 0 |
| ACCUCCAGGAACGGUGCAC        | 1 | 0 | 0 | 1 | 0 |
| GCGGAUGAUGACACCGGGUAU      | 1 | 0 | 1 | 0 | 0 |
| AGUUUCUCUGACUGUGUAGAGC     | 1 | 0 | 1 | 0 | 0 |
| UGGUUUUCGAGACAG            | 1 | 0 | 0 | 1 | 0 |
| GCUAAGAUAAGUGUAGU          | 1 | 0 | 0 | 1 | 0 |
| AGAUUCGGUGCAAUAAG          | 1 | 0 | 1 | 0 | 0 |
| AUUCCUGUUGCCUCCUUCUGAGAA   | 1 | 0 | 0 | 1 | 0 |
| GUGGUUUUCCAGGGCGAGG        | 1 | 1 | 0 | 0 | 0 |
| CGCACUGAUUGAUUUAGAGGC      | 1 | 0 | 0 | 1 | 0 |

|                            |   |   |   |   |   |
|----------------------------|---|---|---|---|---|
| CAGGAGGAUCACGAGUUCGAG      | 1 | 0 | 1 | 0 | 0 |
| AAUACAUGAUGAUCUCACACAACUU  | 1 | 0 | 0 | 0 | 1 |
| UCCCAGGGCGAGGCUUA          | 1 | 0 | 1 | 0 | 0 |
| UUUCAGGGAUCAUUUCUAUAG      | 1 | 1 | 0 | 0 | 0 |
| CAAGAAUCAGUGUAAAAU         | 1 | 0 | 0 | 0 | 1 |
| AGGCCAGCCUGGGCUACACAUUUU   | 1 | 0 | 0 | 1 | 0 |
| AGGCUGUGAUGAUUGGCGCAGG     | 1 | 0 | 0 | 1 | 0 |
| GUCAUAAGAUUCGGUGCAAUA      | 1 | 0 | 1 | 0 | 0 |
| CUAGGCUGGAGUGCAG           | 1 | 0 | 1 | 0 | 0 |
| UCAUUUACUCCCCAGCCUAC       | 1 | 0 | 1 | 0 | 0 |
| CUUGGAUGUCUGAGUGA          | 1 | 0 | 0 | 0 | 1 |
| GCUACUGAAGGAAUGAGAUGAAC    | 1 | 0 | 0 | 1 | 0 |
| AGCUCGCUCUGAAGGCC          | 1 | 1 | 0 | 0 | 0 |
| UACCAUGAUGAUACAUAAG        | 1 | 0 | 0 | 1 | 0 |
| AGCUGCCACUCAUCUUCCUAUAUA   | 1 | 0 | 0 | 1 | 0 |
| AUAUAAAUGGAUUUUUGGAAGUAGG  | 1 | 0 | 1 | 0 | 0 |
| CUUCAGUGAUGACACGAUGACGA    | 1 | 0 | 0 | 0 | 1 |
| AGCACAUAUACUAAAAUUGGAACGAU | 1 | 1 | 0 | 0 | 0 |
| ACUGCGUUCGCGCUCUCCCCU      | 1 | 0 | 0 | 1 | 0 |
| UCUCGGCCUUUUGGCUAAG        | 1 | 0 | 1 | 0 | 0 |
| GCUGAUGACUGUCUUGUUUUUCAG   | 1 | 0 | 0 | 1 | 0 |
| AAUGGAGAGACUUUGACAGCUC     | 1 | 0 | 0 | 1 | 0 |
| UUAAAUGGAUUUUUGGAAGUAGGA   | 1 | 0 | 1 | 0 | 0 |
| UUAUAGCAUGUUAGAGUUCUGAUGGC | 1 | 0 | 0 | 0 | 1 |
| AUACAUGAUGAUCUCACACAA      | 1 | 0 | 1 | 0 | 0 |
| UCCGAUCGUUCCCCUCCAUAAC     | 1 | 1 | 0 | 0 | 0 |
| UUUUGAGGCCUUGCUUU          | 1 | 0 | 1 | 0 | 0 |
| CAUCUGCUGUCACCUGAAU        | 1 | 0 | 1 | 0 | 0 |
| ACGUGGGCACAUUACCCGUCUGAC   | 1 | 0 | 0 | 0 | 1 |
| UGCUGUGAUGACUAUC           | 1 | 0 | 0 | 0 | 1 |

|                          |   |   |   |   |   |
|--------------------------|---|---|---|---|---|
| AAUGAGACCUGUAACAUI       | 1 | 0 | 0 | 0 | 1 |
| AGAUCUGAUGCCCUCUUCU      | 1 | 1 | 0 | 0 | 0 |
| UGUACUGAUUAUCUGUGAGGAUAA | 1 | 0 | 1 | 0 | 0 |
| AAUUCUGCCAGUCUCCUUCAG    | 1 | 0 | 1 | 0 | 0 |
| AUACCAUGAUGAUACAUIAGUU   | 1 | 0 | 1 | 0 | 0 |
| UUCUGACUUCGGUCGGAAA      | 1 | 1 | 0 | 0 | 0 |
| CUCGCUGUGAUGAUGGA        | 1 | 1 | 0 | 0 | 0 |
| AUCCUGGUUGCUCCUAUCUG     | 1 | 1 | 0 | 0 | 0 |
| GUGGGCACAUUACCCAUCUGAC   | 1 | 0 | 0 | 0 | 1 |
| GCAUGUGAUGACAUIAUUUAGCGA | 1 | 1 | 0 | 0 | 0 |
| UGAAUUGCAGUACUCCAACAUI   | 1 | 0 | 0 | 1 | 0 |
| AAGGUAGAUAGAACAGGUCUUGU  | 1 | 0 | 0 | 1 | 0 |
| CUGAGAAAUAAUUGAUGAAA     | 1 | 1 | 0 | 0 | 0 |
| UUCGAGGCCAGCCUGGGCUACACA | 1 | 1 | 0 | 0 | 0 |
| UUCCCAUGAAGAAAU          | 1 | 1 | 0 | 0 | 0 |
| AUUAGCAUGGCCCCUGCGCAAGGA | 1 | 1 | 0 | 0 | 0 |
| GUUCUGUGAUGAGGCUCUGGAAU  | 1 | 0 | 0 | 0 | 1 |
| AGUACCUCCAGGAACGGUGCACC  | 1 | 0 | 0 | 1 | 0 |
| UACCACUGAAGACUGAUA       | 1 | 0 | 0 | 1 | 0 |
| AUACAUGAUGAUCUCACA       | 1 | 0 | 1 | 0 | 0 |
| GUGAAUUGCAGUACUCCAACA    | 1 | 0 | 0 | 1 | 0 |
| UGCAAUUUUUGGAAAAA        | 1 | 0 | 0 | 1 | 0 |
| GUCUUUCGCUCCUAUCUGAU     | 1 | 0 | 1 | 0 | 0 |
| CUCGGUGAUGAGAACU         | 1 | 0 | 1 | 0 | 0 |
| AAUUCGUGAAGCGUUCCAU      | 1 | 0 | 1 | 0 | 0 |
| AAUUUGUGGUAGUGGGGGACU    | 1 | 0 | 0 | 1 | 0 |
| UCUGAUCGUUCACCUCCAUA     | 1 | 0 | 0 | 0 | 1 |
| ACUCACUUGUAGACCAGGCUGG   | 1 | 0 | 0 | 1 | 0 |
| UGCAUAAUUUGUGGUAGUGGGGG  | 1 | 0 | 1 | 0 | 0 |
| GAGGGAGGGAACGCAGUCUGAGUG | 1 | 0 | 1 | 0 | 0 |

|                           |   |   |   |   |   |
|---------------------------|---|---|---|---|---|
| AUUGCACUCCGGAUGUGCUGAC    | 1 | 0 | 0 | 0 | 1 |
| CCUCUAAGAAGUUCUGAGCUU     | 1 | 0 | 0 | 1 | 0 |
| UCCUUGGAUGUCUGAGUG        | 1 | 0 | 0 | 1 | 0 |
| CUUCAGUGAUGACACGA         | 1 | 1 | 0 | 0 | 0 |
| AGGGCGAGGCUCACCCAU        | 1 | 0 | 1 | 0 | 0 |
| GUUCCAGAAGGAACUGUCUGAGGGA | 1 | 1 | 0 | 0 | 0 |
| CUUGUCAUAGUUACACUGACU     | 1 | 1 | 0 | 0 | 0 |
| GCGGAUGAUGACACCUGGG       | 1 | 1 | 0 | 0 | 0 |
| CUACGGGGAUGAUUUGAAAAC     | 1 | 1 | 0 | 0 | 0 |
| CUUGGAUGUCUGAGUG          | 1 | 0 | 0 | 1 | 0 |
| AGGAGUUGGAAUAGGAGCUUGC    | 1 | 0 | 0 | 1 | 0 |
| GUUCGCGCUCUCCCCUGG        | 1 | 0 | 0 | 0 | 1 |
| ACGGUGCACCCCCUCUG         | 1 | 0 | 1 | 0 | 0 |
| CCUAGUGAUGACAAGACG        | 1 | 0 | 1 | 0 | 0 |
| UUGAAAUGAUGACACUGAA       | 1 | 0 | 0 | 1 | 0 |
| GCUGAGGAUGAUUUAAGUU       | 1 | 1 | 0 | 0 | 0 |
| AAGACUAUACUUUCAGGGAUCAU   | 1 | 0 | 0 | 0 | 1 |
| GUGCUGGGAUUAAAGGU         | 1 | 1 | 0 | 0 | 0 |
| UGGAUUUUUGGAACUAGGAG      | 1 | 0 | 0 | 0 | 1 |
| GCAGUACCUCCAGGAACG        | 1 | 0 | 0 | 0 | 1 |
| GAUUGCUGUUGAGACUU         | 1 | 0 | 0 | 0 | 1 |
| UACCAUGAUCACGAAGGUGGUUU   | 1 | 0 | 0 | 1 | 0 |
| AUAUGGAGGUCUCUGUCUGA      | 1 | 1 | 0 | 0 | 0 |
| ACAUCCUGGUUGCUCUUAUCUGA   | 1 | 0 | 0 | 1 | 0 |
| CCCUGGGGUCUGAGGG          | 1 | 0 | 0 | 0 | 1 |
| UUCUCGGCCUUUUGGCUAAGAU    | 1 | 0 | 1 | 0 | 0 |
| UCUUCUGAAUCUCGCUGAGGAAAC  | 1 | 1 | 0 | 0 | 0 |
| AGGAUUUGCUGAAGGAGGCAGA    | 1 | 0 | 0 | 0 | 1 |
| GGCCAGCCUGGGCUACACAUUU    | 1 | 0 | 0 | 1 | 0 |
| UCCGACGUGGAUAUCCCGGG      | 1 | 0 | 1 | 0 | 0 |

|                            |   |   |   |   |   |
|----------------------------|---|---|---|---|---|
| UCUCGGUGAUGAGAACUUU        | 1 | 0 | 0 | 1 | 0 |
| CUGCAUAAUUUGUGGUAGUGGGGA   | 1 | 0 | 1 | 0 | 0 |
| UAAGUGAGGAUGAAGUUAUCUGAG   | 1 | 0 | 0 | 0 | 1 |
| CUGCGAAUAUUCUCGCUGUUCU     | 1 | 0 | 0 | 1 | 0 |
| UAUUCAUUUACUCCCCAGCC       | 1 | 0 | 1 | 0 | 0 |
| AUGAUGAUAAAUAGUUCAGCAG     | 1 | 0 | 1 | 0 | 0 |
| CACCCUGAUGAACUGAAUACCGC    | 1 | 0 | 0 | 0 | 1 |
| GUUCGAGGCCAGCCUGGGCUACAC   | 1 | 1 | 0 | 0 | 0 |
| UCUCGGCCUUUUGGCUAA         | 1 | 0 | 1 | 0 | 0 |
| GUGGAGACCUGAGGGA           | 1 | 0 | 1 | 0 | 0 |
| GAUCACUGACGACUCCAUGUGUCUG  | 1 | 0 | 0 | 0 | 1 |
| UUACCUGAGAAAUAUUGAUGAAAUC  | 1 | 1 | 0 | 0 | 0 |
| UAUCACCCAUGACUGAUGGC       | 1 | 1 | 0 | 0 | 0 |
| UGAGUUCAAUCCAGCAACCACAU    | 1 | 1 | 0 | 0 | 0 |
| AAUUCCUGUUGAAAAACCA        | 1 | 0 | 0 | 1 | 0 |
| AUAUAAGAGUUCGGUUCCCAGC     | 1 | 0 | 0 | 0 | 1 |
| UGUUGAUGAAUACCAACGAUUCUGAU | 1 | 1 | 0 | 0 | 0 |
| UCAUAAGAUUCGGUGCAAUAAG     | 1 | 0 | 0 | 0 | 1 |
| GGGAGGGAACGCAGUCUGAGUGGA   | 1 | 1 | 0 | 0 | 0 |
| AUACCAUGAUGAUAAAUAG        | 1 | 0 | 1 | 0 | 0 |
| CCCCUGCGCAAGGAUGACACGC     | 1 | 1 | 0 | 0 | 0 |
| GGCGAUCUGGCUGCGACAUCUGUCA  | 1 | 0 | 0 | 0 | 1 |
| AUCACCAUGACUGAUGGC         | 1 | 0 | 0 | 0 | 1 |
| AGGCCAGCCUGGGCUACACAUUUUU  | 1 | 1 | 0 | 0 | 0 |
| AGGUAGAUAGAACAGGUCUUGUU    | 1 | 0 | 1 | 0 | 0 |
| AGAAAUGAUGAUUGGAGC         | 1 | 0 | 0 | 0 | 1 |
| GAUCUAUUGUCUGAUGCA         | 1 | 0 | 0 | 0 | 1 |
| UAGUCAAGUUCUGAUC           | 1 | 1 | 0 | 0 | 0 |
| AAAAUAUAAGAGUUCGGUUC       | 1 | 1 | 0 | 0 | 0 |
| AUUAUGAGAUUAUGAGGG         | 1 | 0 | 0 | 1 | 0 |

|                          |   |   |   |   |   |
|--------------------------|---|---|---|---|---|
| CAAGUGUAGUAUCUGUU        | 1 | 0 | 1 | 0 | 0 |
| GAGGCCAGCCUGGGCUAC       | 1 | 1 | 0 | 0 | 0 |
| UACAUGUGAUGAAGCAAA       | 1 | 0 | 0 | 0 | 1 |
| UCCGAUCGUUCCCCUCCAUA     | 1 | 0 | 1 | 0 | 0 |
| UGCAUGUGAUGACAUAUUUAGCGA | 1 | 0 | 0 | 1 | 0 |
| GUUGCUCUUAUCUGAU         | 1 | 0 | 0 | 0 | 1 |
| UUUGGUAAUCUGAUGGC        | 1 | 0 | 0 | 1 | 0 |
| UAUGGAGGUCUCUGUCUG       | 1 | 0 | 0 | 1 | 0 |
| AGAAGUUUCUCUGACUGUGUAG   | 1 | 0 | 0 | 1 | 0 |
| CCUUAUCUUCUCUCUGAGCU     | 1 | 0 | 1 | 0 | 0 |
| GAUUUUUGGAAGUAGG         | 1 | 1 | 0 | 0 | 0 |
| UCUGAAGGCCUGUUCCUAGGC    | 1 | 1 | 0 | 0 | 0 |
| GUCAUCUACUACUGAA         | 1 | 0 | 0 | 1 | 0 |
| AAGUGGGUCGCACAGA         | 1 | 0 | 0 | 0 | 1 |
| GUGCAGUGAUGUGUGAAUUUCU   | 1 | 1 | 0 | 0 | 0 |
| AUGGAUUUUUGGAAGUAG       | 1 | 1 | 0 | 0 | 0 |
| UAAAUGGAUUUUUGGAAGUA     | 1 | 0 | 1 | 0 | 0 |
| AGGAUCACGAGUUCGAG        | 1 | 0 | 0 | 0 | 1 |
| GCAUGUUAGAGUUCUGAUGGC    | 1 | 0 | 1 | 0 | 0 |
| AAGAUUCGGUGCAAUAAG       | 1 | 0 | 0 | 0 | 1 |
| ACUAUACUUUCAGGGAUCAUU    | 1 | 0 | 0 | 0 | 1 |
| AUACAUGAUGAUCUCACACA     | 1 | 0 | 0 | 0 | 1 |
| CAAUUUUUUGAGGCCUU        | 1 | 0 | 1 | 0 | 0 |
| AAGCAUAAUUUUUUGGUAAUUG   | 1 | 0 | 1 | 0 | 0 |
| UCUAAGAAGUUCUGAGCU       | 1 | 0 | 1 | 0 | 0 |
| CUGUAAACGCUUUCUGAU       | 1 | 0 | 1 | 0 | 0 |
| GCUACGGGGAUGAUAUG        | 1 | 1 | 0 | 0 | 0 |
| UUUUUGAGGCCUUGUC         | 1 | 1 | 0 | 0 | 0 |
| AUCGUAAUAAUCUUUCG        | 1 | 0 | 1 | 0 | 0 |
| CAUGGAGGUCUCUGUCUGACUUAG | 1 | 0 | 0 | 1 | 0 |

|                           |   |   |   |   |   |
|---------------------------|---|---|---|---|---|
| GCCAGCCUGGGCUACA          | 1 | 1 | 0 | 0 | 0 |
| AGGAGGCAGAGGCAGGAG        | 1 | 0 | 0 | 0 | 1 |
| CCCCUCUGAUGUUCAG          | 1 | 0 | 1 | 0 | 0 |
| AAAAUUAAGAGUUCGGUU        | 1 | 1 | 0 | 0 | 0 |
| GUGAUUGGAAGACACUCUGCAAC   | 1 | 0 | 1 | 0 | 0 |
| CACGCCGGUAGGAUUUGCUGAAGG  | 1 | 0 | 1 | 0 | 0 |
| GCACGUCACCCUCCUGAA        | 1 | 0 | 1 | 0 | 0 |
| AUAUAAAUGGAUUUUUGGAAGUAG  | 1 | 1 | 0 | 0 | 0 |
| AAUGAGACCUGUAACAUUU       | 1 | 0 | 1 | 0 | 0 |
| AGUUAUCCCUGUCUGAA         | 1 | 0 | 0 | 1 | 0 |
| AUGGAUUUUUGGAACUAG        | 1 | 0 | 1 | 0 | 0 |
| UAGGGUGAUGAAAACGU AU      | 1 | 0 | 0 | 0 | 1 |
| UGUACAUGAUGAAAACA         | 1 | 0 | 0 | 0 | 1 |
| AGCUUGUGAUGAGACAUCUCC     | 1 | 1 | 0 | 0 | 0 |
| AGCAGCAGGCCAGACUCAGACAUG  | 1 | 1 | 0 | 0 | 0 |
| UGCAGAUGAUGUGACAGAAUAUUUG | 1 | 0 | 1 | 0 | 0 |
| CCUCCAGGAACGGUGCAC        | 1 | 0 | 0 | 1 | 0 |
| GGUCA AUGAUGUGUUG         | 1 | 1 | 0 | 0 | 0 |
| GAGGCCAGCUUGGGCUACACA UU  | 1 | 0 | 0 | 0 | 1 |
| CGUCUGUGAUGUUCUGCUAU      | 1 | 1 | 0 | 0 | 0 |
| GCUUGUGAUGAGACAUCUCC      | 1 | 0 | 1 | 0 | 0 |
| UCUGUCACCCCAUUGA          | 1 | 0 | 1 | 0 | 0 |
| GGAGGAUUAUGUGUGACAGACA    | 1 | 0 | 1 | 0 | 0 |
| UUUCGCUCCUAUCUGAU         | 1 | 1 | 0 | 0 | 0 |
| UGGCAAUCAUCUUUCG          | 1 | 0 | 0 | 0 | 1 |
| AACAUGUGAUGAGAAA          | 1 | 0 | 0 | 0 | 1 |
| UGCUGACCCUGCAAU           | 1 | 0 | 1 | 0 | 0 |
| CACAAUGAUGAUGAAUGGU       | 1 | 0 | 1 | 0 | 0 |
| GGAUUUUUGGAAGUAGGA        | 1 | 0 | 1 | 0 | 0 |
| AUCCCUAGUUAGCUGAC         | 1 | 0 | 1 | 0 | 0 |

|                            |   |   |   |   |   |
|----------------------------|---|---|---|---|---|
| CGGCGAUGAUGACACUCCAUAAC    | 1 | 0 | 1 | 0 | 0 |
| AUACCAUGAUGAUAAAC          | 1 | 0 | 0 | 1 | 0 |
| AAACACAGGAACACCUGAG        | 1 | 0 | 1 | 0 | 0 |
| GAAAAUGAUGAUUGGAGCUUGCAUGA | 1 | 0 | 1 | 0 | 0 |
| AAAGCGUGAUGAUUGGGUGUUCA    | 1 | 0 | 1 | 0 | 0 |
| ACCACGAGGACGAGACGU         | 1 | 0 | 1 | 0 | 0 |
| CUUAAUGAUGAACAAUGUAA       | 1 | 1 | 0 | 0 | 0 |
| UUAAAUGGAUUUUUGGAAGUA      | 1 | 0 | 1 | 0 | 0 |
| CCUGGGCUACACAUUU           | 1 | 0 | 0 | 1 | 0 |
| AUUGCAGUACUCCAACAUU        | 1 | 0 | 1 | 0 | 0 |
| CUAUACUUUCAGGGAUCAUU       | 1 | 0 | 0 | 0 | 1 |
| GGGAGAGGACACAGUCUGAG       | 1 | 0 | 1 | 0 | 0 |
| GGCUGGGCUAGGCCGGGUG        | 1 | 1 | 0 | 0 | 0 |
| CCUGCGCAAGGAUGACAC         | 1 | 0 | 0 | 0 | 1 |
| CACAAUGAUGAUGAAUGGUC       | 1 | 0 | 0 | 0 | 1 |
| UCACAAUGAUGAUGAAUGGU       | 1 | 1 | 0 | 0 | 0 |
| CCUGGUUGCUCCUAUCUGAU       | 1 | 0 | 0 | 0 | 1 |
| UGUACAUGAUGAAAAC           | 1 | 1 | 0 | 0 | 0 |
| UUCGGUUCCCAGCACCCACGGCUGUC | 1 | 0 | 0 | 0 | 1 |
| CUCCGGGGUACUGGUUAGUUCA     | 1 | 0 | 1 | 0 | 0 |
| UAUGAUGACUGAUUACCUGAG      | 1 | 0 | 0 | 0 | 1 |
| UGUGAGAAGAAUUUUUG          | 1 | 0 | 1 | 0 | 0 |
| UGGCGCACGCCGGUAG           | 1 | 0 | 1 | 0 | 0 |
| GGUGAAUUGCAGUACUCCA        | 1 | 0 | 1 | 0 | 0 |
| GAUGAUUGUGAUCUAUUGUCUGAU   | 1 | 1 | 0 | 0 | 0 |
| UGUUCUGUGAUGAGGCUCUGGA     | 1 | 0 | 1 | 0 | 0 |
| GGGACUGACCUGAAAUGAAGAGA    | 1 | 1 | 0 | 0 | 0 |
| UCCUAGUGAUGACAAGA          | 1 | 0 | 0 | 1 | 0 |
| CCUGGCUGUCCUGGAACUCAC      | 1 | 1 | 0 | 0 | 0 |
| UUGCACAGUGAACACCCAA        | 1 | 0 | 0 | 0 | 1 |

|                            |   |   |   |   |   |
|----------------------------|---|---|---|---|---|
| CUCGGUGAUGAGAACUUUGUCCAGUU | 1 | 1 | 0 | 0 | 0 |
| UAGGGUGAUGAAAACGUA         | 1 | 1 | 0 | 0 | 0 |
| CACCCUUGACUGAUGGC          | 1 | 0 | 1 | 0 | 0 |
| UAUUUGGCUGUUGUGUGAGACAUU   | 1 | 0 | 1 | 0 | 0 |
| ACUCCGGAUGUGCUGACCCCUGC    | 1 | 0 | 1 | 0 | 0 |
| CCGGGGUACUGGUUAGUUCA       | 1 | 0 | 0 | 0 | 1 |
| CUAGGGUGAUGAAAACG          | 1 | 0 | 0 | 0 | 1 |
| CGCUUCUCGGCCUUUUGGCUAAGA   | 1 | 0 | 1 | 0 | 0 |
| CUCUAGCUGCAUAUGUAUCAAAAAG  | 1 | 0 | 0 | 0 | 1 |
| UGUGAGGGCGAUCUGGC          | 1 | 1 | 0 | 0 | 0 |
| GAGGCCAGCCUGGGCUACACAU     | 1 | 0 | 0 | 1 | 0 |
| AAUCAUGACCCGAGAGGUGCAG     | 1 | 1 | 0 | 0 | 0 |
| ACAUGUGAUGAGAAACU          | 1 | 0 | 1 | 0 | 0 |
| UCUCGCUGAGGAAACUG          | 1 | 0 | 0 | 1 | 0 |
| AAUUCCUGUUGAAAAA           | 1 | 0 | 1 | 0 | 0 |
| CACAAGUGAUGAGUGACAAAGGG    | 1 | 0 | 1 | 0 | 0 |
| GGGAGGGAACGCAGUCUGAGUG     | 1 | 0 | 0 | 0 | 1 |
| AUGAGUAAGGAAAAUAACGAUU     | 1 | 0 | 0 | 1 | 0 |
| GAUUUAAUGAGCCUGAU          | 1 | 1 | 0 | 0 | 0 |
| UCAAGUGUAGUAUCUGUUC        | 1 | 1 | 0 | 0 | 0 |
| AUGGCUGAGUUGCAAUGAUG       | 1 | 1 | 0 | 0 | 0 |
| UCUGCCAGUCUCCUUCAG         | 1 | 0 | 0 | 1 | 0 |
| UUCCCCAUGAAGAAAUGUU        | 1 | 0 | 0 | 0 | 1 |
| CAGAGGCAGGAGGAUCACG        | 1 | 0 | 0 | 0 | 1 |
| AUUCCCUGUUGCCUCCUUCUGAG    | 1 | 0 | 0 | 1 | 0 |
| GAUUUUUGGAACUAGGA          | 1 | 0 | 1 | 0 | 0 |
| AGAAAUGAUGAUUGGAGCU        | 1 | 0 | 1 | 0 | 0 |
| UACAUGUGAUGAAGCAAUC        | 1 | 0 | 1 | 0 | 0 |
| CCCAGCUGAGUGUUUCUUUGAAGAGA | 1 | 1 | 0 | 0 | 0 |
| CUUAAUGAUGAACAAUGUAAAUGA   | 1 | 1 | 0 | 0 | 0 |

|                            |   |   |   |   |   |
|----------------------------|---|---|---|---|---|
| GGGCUGGAGAGAUGGCUCAGCCGUU  | 1 | 0 | 0 | 0 | 1 |
| CUCACCCUGAUGAACUG          | 1 | 1 | 0 | 0 | 0 |
| CCCAUGAAGAAAUGUUCACAC      | 1 | 0 | 1 | 0 | 0 |
| GUUAGUGAUGAUCAAUA          | 1 | 0 | 1 | 0 | 0 |
| AUUAAAUGGAUUUUUGGAAGUAGG   | 1 | 0 | 0 | 0 | 1 |
| AGGUAGAUAGAACAGG           | 1 | 1 | 0 | 0 | 0 |
| AAGUUUCUCUGACUGUGUA        | 1 | 0 | 0 | 1 | 0 |
| UGCCCGAUGAUUAUAA           | 1 | 1 | 0 | 0 | 0 |
| CUGCAUAAUUUGUGGUAGUGGG     | 1 | 0 | 1 | 0 | 0 |
| UAUUCAUUUACUCCCCAGCCUAC    | 1 | 1 | 0 | 0 | 0 |
| GUCAGAUGAUUUGAAAUGAUGA     | 1 | 0 | 0 | 1 | 0 |
| GGAUUUUUGGAAGUAGGAG        | 1 | 0 | 0 | 1 | 0 |
| AUUAAAUGGAUUUUUGGAAGUAGGA  | 1 | 0 | 1 | 0 | 0 |
| CGGAUCUGGCUUCUGAGA         | 1 | 1 | 0 | 0 | 0 |
| AAUGGAUUUUUGGAACUAGGA      | 1 | 0 | 1 | 0 | 0 |
| AAGCCCAUGAUGGUUAU          | 1 | 1 | 0 | 0 | 0 |
| GCGGGAAACUCGACUGCA         | 1 | 0 | 0 | 0 | 1 |
| ACCACCAUGAUUAUAACUGAG      | 1 | 1 | 0 | 0 | 0 |
| GUGAAUUGCAGUACUCCA         | 1 | 1 | 0 | 0 | 0 |
| AAGCAGGAUUUAACUACAAUAUAGC  | 1 | 0 | 0 | 0 | 1 |
| CAGCCUGGGCUACACAUUUUUUU    | 1 | 0 | 1 | 0 | 0 |
| UCACAAUGAUGAUGAAUGGUCCAAAC | 1 | 0 | 1 | 0 | 0 |
| CUCCAGGAACGGUGCACC         | 1 | 0 | 0 | 1 | 0 |
| UUUAGAGGCAUUUGUCUGAG       | 1 | 0 | 0 | 0 | 1 |
| CCGUUAAAGGCUAGGCUCAC       | 1 | 0 | 0 | 0 | 1 |
| CAGGAGGAUCACGAGUUCGAGG     | 1 | 0 | 0 | 0 | 1 |
| UUUUACUAAAGAUUCCGUGGA      | 1 | 0 | 0 | 0 | 1 |
| UCGCUGUGAUGAUGGAUUCCAAAC   | 1 | 0 | 0 | 0 | 1 |
| GUGCUGACCCUGCGAUUUC        | 1 | 1 | 0 | 0 | 0 |
| GCACGCCGGUAGGAUUUGCUG      | 1 | 1 | 0 | 0 | 0 |

|                            |   |   |   |   |   |
|----------------------------|---|---|---|---|---|
| UGGAAAUGAUGAAAUA           | 1 | 1 | 0 | 0 | 0 |
| UUCGCUGUGAUGAUGGA          | 1 | 0 | 1 | 0 | 0 |
| UCGACUGCAUAAUUUGUGGUAGUG   | 1 | 0 | 1 | 0 | 0 |
| GCAAUGAUGUCAUCUACUACUGAA   | 1 | 0 | 0 | 1 | 0 |
| UACUCAAGGGAACAGU           | 1 | 1 | 0 | 0 | 0 |
| CACAAGUGAUGAGUGACAAAG      | 1 | 0 | 0 | 0 | 1 |
| CAGGUUUUCUGACUUCGGU        | 1 | 0 | 0 | 0 | 1 |
| ACAACUGAGCUUGUUGAUGAA      | 1 | 0 | 0 | 1 | 0 |
| UGAGGAUGAAGUUUAUCUGAG      | 1 | 0 | 0 | 1 | 0 |
| GAUUUUUGGAAGUAGGA          | 1 | 0 | 0 | 0 | 1 |
| CCAGCCUGGGCUACACAUUUUUA    | 1 | 0 | 0 | 0 | 1 |
| UCCUAGUGAUGACAAG           | 1 | 0 | 0 | 1 | 0 |
| UUCCCAGGGCGAGGCUUAUC       | 1 | 0 | 1 | 0 | 0 |
| UGUUCCAGAAGGAACUGUCUGAGGGA | 1 | 1 | 0 | 0 | 0 |
| AAAGCGUGAUGAUUGGGUGUUC     | 1 | 0 | 1 | 0 | 0 |
| GAUUGCUGUUGAGACUUG         | 1 | 0 | 0 | 1 | 0 |
| CUGCAUAAUUUGUGGUAGUG       | 1 | 0 | 1 | 0 | 0 |
| CGCGGAUGAUGACACCUGGGU      | 1 | 0 | 0 | 0 | 1 |
| AGCUUGUGAUGAGACAUCUC       | 1 | 0 | 0 | 0 | 1 |
| UGGAUAUGAUGACUGAUUACCUGA   | 1 | 0 | 0 | 0 | 1 |
| GACACCCUGGGGUCUGAGGGG      | 1 | 0 | 0 | 0 | 1 |
| AAUGGAGAGACUUUGACAGCUCA    | 1 | 0 | 0 | 1 | 0 |
| AAGGUGGUUUUCCCAGG          | 1 | 1 | 0 | 0 | 0 |
| UGGCUGGGGAAAUGACUGGA       | 1 | 1 | 0 | 0 | 0 |
| AACCAAUUUUUUGAGGCCUU       | 1 | 0 | 1 | 0 | 0 |
| CACUGACGACUCCAUGUGUCUGAGCA | 1 | 0 | 1 | 0 | 0 |
| AACCUUGGAGAGCUGAG          | 1 | 1 | 0 | 0 | 0 |
| GUACAUGAUGAAAACAGUCUCC     | 1 | 0 | 0 | 1 | 0 |
| CGUGGGCACAUUACCCGUCUGAC    | 1 | 0 | 1 | 0 | 0 |
| CACAUGGUGGCUCACAA          | 1 | 1 | 0 | 0 | 0 |

|                            |   |   |   |   |   |
|----------------------------|---|---|---|---|---|
| CCAGCCUGGGCUACACAUUUUUU    | 1 | 0 | 0 | 0 | 1 |
| AUGUCCUGCAAUUCUGAA         | 1 | 1 | 0 | 0 | 0 |
| GCUGGCUGGGGAAAAUGACUG      | 1 | 1 | 0 | 0 | 0 |
| AAUGAGUGAUGACAAGAUGUUUCGG  | 1 | 0 | 0 | 0 | 1 |
| GGGUGAAUUGCAGUACUCCAAC     | 1 | 0 | 1 | 0 | 0 |
| AAGACUCCAGACACAUC          | 1 | 0 | 0 | 0 | 1 |
| UUUCUAUGAUGAAUCAAAACU      | 1 | 0 | 1 | 0 | 0 |
| ACUGAUUAAUGAGCCUGAUCCA     | 1 | 0 | 0 | 0 | 1 |
| UGCUGUGAUGAUGCCU           | 1 | 0 | 0 | 0 | 1 |
| UCUUAUUUCAUACCUGCGACAUC    | 1 | 0 | 0 | 0 | 1 |
| GAGGCCAGCCUGGGCUACACA      | 1 | 0 | 0 | 1 | 0 |
| UGCAUGUGAUGACAUAUUUA       | 1 | 0 | 0 | 1 | 0 |
| ACGCAUCGACCUUGUAUUGC       | 1 | 0 | 1 | 0 | 0 |
| UGGGCACAUUACCCGUCUGAC      | 1 | 0 | 0 | 1 | 0 |
| AACAUAUGACUGCUAUAUGAUUUC   | 1 | 0 | 0 | 1 | 0 |
| AGCCUGGGCUACACAUUUUUU      | 1 | 1 | 0 | 0 | 0 |
| GACACAGUCUGAGUGG           | 1 | 0 | 0 | 0 | 1 |
| CAAAGAAUAAGUUGGGAU         | 1 | 0 | 0 | 0 | 1 |
| GUCCUGCAAUUCUGAA           | 1 | 0 | 1 | 0 | 0 |
| CGGCGAUGAUGACACUCCAUAUACAU | 1 | 0 | 1 | 0 | 0 |
| AUUAAAUGGAUUUUUGGAACUAGGAG | 1 | 1 | 0 | 0 | 0 |
| UGGAUAUGAUGACUGAU          | 1 | 1 | 0 | 0 | 0 |
| GGGUACUGGUUAGUUC           | 1 | 0 | 0 | 1 | 0 |
| CGGGAAACUCGACUGCAU         | 1 | 0 | 1 | 0 | 0 |
| CGUUUGAGUCUCACGACUGUGAGAU  | 1 | 1 | 0 | 0 | 0 |
| GGCCAGCCUGGGCUACACAUUUUU   | 1 | 0 | 0 | 0 | 1 |
| AAAUGGAUUUUUGGAAGUAGGA     | 1 | 0 | 0 | 0 | 1 |
| CAUUGCACUCCGGAUGUGCU       | 1 | 0 | 0 | 0 | 1 |
| UCCGGGUGAUGCGAAUCGUAUCUGA  | 1 | 0 | 0 | 1 | 0 |
| UACGGGGAUGAUAUGAAAA        | 1 | 0 | 1 | 0 | 0 |

|                            |   |   |   |   |   |
|----------------------------|---|---|---|---|---|
| UUAAAUGGAUUUUUGGAAGUAGGAGU | 1 | 1 | 0 | 0 | 0 |
| GUACAUGAUGAAAACAGU         | 1 | 0 | 1 | 0 | 0 |
| UUCGCUGUGAUGAUGGAUUCCAA    | 1 | 0 | 1 | 0 | 0 |
| GUCCUCUAAGAAGUUCUGAGC      | 1 | 0 | 1 | 0 | 0 |
| CCAGCCUGGGCUACACAU         | 1 | 0 | 0 | 1 | 0 |
| AGAGGACACAGUCUGAGUGG       | 1 | 0 | 0 | 1 | 0 |
| CUUCAGUGAUGACACGAUGACG     | 1 | 0 | 1 | 0 | 0 |
| UCGGGACUGACCUGAAAUGAAGAGA  | 1 | 0 | 0 | 1 | 0 |
| GCCCCUGCGCAAGGAUG          | 1 | 0 | 1 | 0 | 0 |
| CAUUGUUUCAAGACGGGACUGAA    | 1 | 1 | 0 | 0 | 0 |
| CGCCGGUAGGAUUUGCUGAAGG     | 1 | 0 | 1 | 0 | 0 |
| AGGCCAGACUCAGACAUG         | 1 | 1 | 0 | 0 | 0 |
| AGAGGACACAGUCUGAGU         | 1 | 0 | 0 | 0 | 1 |
| AUAAUGAUUUCAGCAUUU AACUGAG | 1 | 1 | 0 | 0 | 0 |
| AAAAAGUCCUAUUUGUGAGCGU     | 1 | 0 | 0 | 0 | 1 |
| UGGAGUUCAUGCAAGUUC         | 1 | 0 | 0 | 1 | 0 |
| UAAAGGAUUUACCUGAGG         | 1 | 0 | 0 | 1 | 0 |
| GAGAAAUGCGGAUAUGGGA        | 1 | 0 | 0 | 1 | 0 |
| CACAAUGAUGACAUCAUAUUU      | 1 | 1 | 0 | 0 | 0 |
| UUUGAUCCUUCUCUGGU          | 1 | 1 | 0 | 0 | 0 |
| UUCGCUGUGAUGAUGGAU         | 1 | 1 | 0 | 0 | 0 |
| CCCACUGUGCUGACACUC         | 1 | 0 | 0 | 0 | 1 |
| CCUCAAGGGACCUUGGAGACAAU    | 1 | 0 | 1 | 0 | 0 |
| GAUUUAAUGAGCCUGAUCCA       | 1 | 0 | 0 | 1 | 0 |
| UAAAUGGAUUUUUGGAAGUAGG     | 1 | 0 | 0 | 0 | 1 |
| CCUAGUGAUGACAAGAC          | 1 | 0 | 0 | 1 | 0 |
| AGACCUACUUAUCUACCAA        | 1 | 1 | 0 | 0 | 0 |
| GAGAAUACUCUUGCUGAU         | 1 | 1 | 0 | 0 | 0 |
| UGUGCUGACCCCUGCGAUUUCCCA   | 1 | 1 | 0 | 0 | 0 |
| UUGCUGGGAAUUGAACUCAGG      | 1 | 0 | 0 | 0 | 1 |

|                          |   |   |   |   |   |
|--------------------------|---|---|---|---|---|
| UUGCUGUGAUGACUAUC        | 1 | 0 | 1 | 0 | 0 |
| AGCUCUAGAAUACUCUGAGACC   | 1 | 0 | 1 | 0 | 0 |
| GGAUCACGAGUUCGAGGCCA     | 1 | 1 | 0 | 0 | 0 |
| UCUGCCAGUCUCCUUCAGACAAAA | 1 | 1 | 0 | 0 | 0 |
| UUUUUGGAAGUAGGAG         | 1 | 0 | 0 | 0 | 1 |
| UCAAGUGUAGUAUCUGUUCUUAUC | 1 | 0 | 0 | 0 | 1 |
| GUUAGUGAUGAUCAAUAAAGUUAA | 1 | 0 | 0 | 1 | 0 |
| GAGGCCAGCCUGGGCUACAC     | 1 | 0 | 0 | 0 | 1 |
| CUAACUCCAUGGUAUG         | 1 | 1 | 0 | 0 | 0 |
| GUGAAGCGUCCAUAUU         | 1 | 0 | 1 | 0 | 0 |
| CGAGGACAAUAUAUAAAUG      | 1 | 1 | 0 | 0 | 0 |
| AUGGAUUUUUGGAAGUAGG      | 1 | 0 | 1 | 0 | 0 |
| GGCCAAGGAUGAGAAC         | 1 | 1 | 0 | 0 | 0 |
| ACUGCCUUUUGAUGACCAGGG    | 1 | 0 | 0 | 1 | 0 |
| AGCCUAUGAUGGAUUG         | 1 | 0 | 1 | 0 | 0 |
| ACUCAUCUUCCAUAUAUA       | 1 | 0 | 0 | 0 | 1 |
| AUACAUGAUGAUCUCA         | 1 | 0 | 1 | 0 | 0 |
| ACCUCCUUGGAUGUCUGAGUGA   | 1 | 0 | 1 | 0 | 0 |
| UGGAUUUUUGGAACUA         | 1 | 0 | 1 | 0 | 0 |
| GCAUAAUUUGUGGUAGUGG      | 1 | 0 | 1 | 0 | 0 |
| GAACCCUUUCCAUCUGAU       | 1 | 0 | 1 | 0 | 0 |
| UGUAUCAAAAAGAUGGCCUAGUUG | 1 | 0 | 0 | 0 | 1 |
| AAGGAAAUAACGAUUCGGGG     | 1 | 0 | 0 | 0 | 1 |
| ACGAGUUCGAGGCCAGCCUGG    | 1 | 1 | 0 | 0 | 0 |
| GUUCUGUGAUGAGGCUC        | 1 | 1 | 0 | 0 | 0 |
| GCGGAUGAUGACACCU         | 1 | 1 | 0 | 0 | 0 |
| GGUGCAAUUUUUGGAAAAA      | 1 | 0 | 1 | 0 | 0 |
| CCACGAGGACGAGACGUAG      | 1 | 0 | 0 | 1 | 0 |
| CUGCAUAAUUUGUGGUAGU      | 1 | 0 | 1 | 0 | 0 |
| UGGCCCCUGCGCAAGGAUGACAC  | 1 | 0 | 1 | 0 | 0 |

|                             |   |   |   |   |   |
|-----------------------------|---|---|---|---|---|
| CUUUUGUGAAGAGUCAU           | 1 | 0 | 0 | 1 | 0 |
| CACCCAUGACUGAUGGC           | 1 | 0 | 1 | 0 | 0 |
| AACCAAAAAUAUAAGAGUUCGGUUC   | 1 | 0 | 1 | 0 | 0 |
| GAGAAAUGC GGUAUAUGGGACUGAGA | 1 | 1 | 0 | 0 | 0 |
| AGGAUUUGCUGAAGGAGG          | 1 | 1 | 0 | 0 | 0 |
| AGAAAUGAUGAUUGGAG           | 1 | 0 | 1 | 0 | 0 |
| AAGCCCAUGAUGGUAUGA          | 1 | 1 | 0 | 0 | 0 |
| GGUAGGAUUUGCUGAAGGAG        | 1 | 0 | 0 | 0 | 1 |
| CUUCAGUGAUGACACGAUGACGAGU   | 1 | 0 | 0 | 1 | 0 |
| GAGUUCGAGGCCAGCCUGGGCUA     | 1 | 0 | 0 | 1 | 0 |
| AAUUCGUGAAGCGUCCAUUUUU      | 1 | 0 | 1 | 0 | 0 |
| UAACUCUGAUGAACAA            | 1 | 0 | 1 | 0 | 0 |
| GGUGAAUUGCAGUACUC           | 1 | 0 | 1 | 0 | 0 |
| CUCGCUGUGAUGAUGGAU          | 1 | 0 | 1 | 0 | 0 |
| UAUGAACUAACCAGUACCCCGGAGCU  | 1 | 0 | 0 | 1 | 0 |
| UGUCCUCUAAGAAGUUCUGAGCU     | 1 | 1 | 0 | 0 | 0 |
| GGGACUGCGUUCGCGCUCUC        | 1 | 1 | 0 | 0 | 0 |
| GGGAGAGGACACAGUCUGAGUGG     | 1 | 0 | 0 | 0 | 1 |
| UACCUGAGAAAUAUUGAUGAAA      | 1 | 1 | 0 | 0 | 0 |
| CACUGUGCUGACACUCACAUUGCUG   | 1 | 0 | 0 | 1 | 0 |
| GAUCAAGUGUAGUAUC            | 1 | 0 | 1 | 0 | 0 |
| CCCCUAUGAUGAGGAC            | 1 | 0 | 1 | 0 | 0 |
| GAGAGGACACAGUCUGAGUG        | 1 | 0 | 0 | 1 | 0 |
| UUCUCAUGUCUCUUUAC           | 1 | 0 | 1 | 0 | 0 |
| UAUUCAUUUACUCCCAGCCUACA     | 1 | 1 | 0 | 0 | 0 |
| UUCUGUGAUGAGGCUCUGG         | 1 | 0 | 1 | 0 | 0 |
| UCGAGGCCAGCCUGGGCUA         | 1 | 0 | 0 | 1 | 0 |
| AUUCUGCCAGUCUCCUUCAG        | 1 | 0 | 0 | 1 | 0 |
| UGGAUUUUUGGAACUAGGAGUUGGA   | 1 | 0 | 1 | 0 | 0 |
| GCGGAUGAUGACACCUGGGUAUGCUG  | 1 | 1 | 0 | 0 | 0 |

|                            |   |     |      |     |     |
|----------------------------|---|-----|------|-----|-----|
| UAGUGGUGGGCGCACGCCGGU      | 1 | 0   | 1    | 0   | 0   |
| AUUACUUGAUGAUAGUAAAAGAUCUG | 1 | 0   | 1    | 0   | 0   |
| GUCUCGGUGAUGAGAACUU        | 1 | 0   | 0    | 0   | 1   |
| UAGUGGGGGACUGCGU           | 1 | 0   | 1    | 0   | 0   |
| ACCUGGCAGGGGAGUA           | 1 | 0   | 0    | 1   | 0   |
| CCCCUAUGAUGAGGACCUUUU      | 1 | 0   | 0    | 1   | 0   |
| AUACCAUGAUGAUACAUCU        | 1 | 0   | 0    | 0   | 1   |
| CCUAGUGAUGACAAGACGA        | 1 | 0   | 1    | 0   | 0   |
| CUCCAGGAACGGUGCAC          | 1 | 0   | 0    | 1   | 0   |
| GUUUCUCUGACUGUGUAGA        | 1 | 1   | 0    | 0   | 0   |
| GAGAAAUGCAGGAUAUGGGACUGAG  | 1 | 0   | 0    | 1   | 0   |
| UUAAUCCUUACCUGUCC          | 1 | 0   | 0    | 1   | 0   |
| GGGCUGGAGAGAUGGCUCAGCCGU   | 1 | 0   | 0    | 1   | 0   |
| GGGAACGCAGUCUGAGUGG        | 1 | 0   | 1    | 0   | 0   |
| AUUGCACUCCGGAUGUG          | 1 | 0   | 1    | 0   | 0   |
| GAAGAUUAGCAUGGCC           | 1 | 0   | 0    | 1   | 0   |
| Total Reads                |   | 990 | 1012 | 798 | 482 |

The expression of these sn/snoRNA-derived small RNAs were generally independent of DGCR8 whereas they were depleted by an average of 40% in the *Dicer* null sample. Note that the most abundantly expressed ones showed more dramatic depletion.</.>
