# Supplementary material
Source: PubMed Central journal article supplement (PMC2626731)
Supplement: 0810766105_ST3_PDF.pdf [file 0810766105_ST3_PDF.pdf]

Table S3. Small RNA reads that were mapped to microRNAs.

| microRNAs       | DGCR8_WT | DGCR8_KO | Remaining ratio, % | microRNAs       | Dicer_WT | Dicer_KO | Remaining ratio, % |
|-----------------|----------|----------|--------------------|-----------------|----------|----------|--------------------|
| mmu-miR-203     | 75804    | 342      | 0.53               | mmu-miR-203     | 62861    | 223      | 0.59               |
| mmu-miR-205     | 45001    | 311      | 0.82               | mmu-miR-205     | 34637    | 269      | 1.28               |
| mmu-miR-27b     | 15348    | 607      | 4.68               | mmu-miR-27b     | 14630    | 296      | 3.34               |
| mmu-miR-26a     | 12875    | 397      | 3.65               | mmu-miR-26a     | 11311    | 262      | 3.83               |
| mmu-let-7f      | 11347    | 214      | 2.23               | mmu-let-7f      | 9121     | 263      | 4.77               |
| mmu-miR-24      | 10825    | 344      | 3.76               | mmu-miR-24      | 12118    | 349      | 4.76               |
| mmu-let-7a      | 10595    | 245      | 2.74               | mmu-let-7a      | 7897     | 324      | 6.79               |
| mmu-let-7i      | 9009     | 425      | 5.58               | mmu-let-7i      | 8250     | 432      | 8.66               |
| mmu-let-7c      | 8020     | 207      | 3.06               | mmu-let-7c      | 8225     | 291      | 5.86               |
| mmu-miR-27a     | 7951     | 267      | 3.97               | mmu-miR-27a     | 10455    | 262      | 4.14               |
| mmu-let-7g      | 7861     | 169      | 2.54               | mmu-let-7g      | 5626     | 181      | 5.32               |
| mmu-miR-200b    | 7816     | 78       | 1.18               | mmu-miR-200b    | 6416     | 23       | 0.59               |
| mmu-miR-17      | 7765     | 315      | 4.80               | mmu-miR-17      | 5725     | 65       | 1.88               |
| mmu-miR-20a     | 7314     | 162      | 2.62               | mmu-miR-20a     | 4727     | 65       | 2.27               |
| mmu-miR-200c    | 7114     | 82       | 1.36               | mmu-miR-200c    | 7461     | 23       | 0.51               |
| mmu-miR-200a    | 7008     | 63       | 1.06               | mmu-miR-200a    | 6899     | 16       | 0.38               |
| mmu-miR-93      | 6273     | 210      | 3.96               | mmu-miR-93      | 4986     | 109      | 3.61               |
| mmu-miR-19b     | 6108     | 211      | 4.09               | mmu-miR-19b     | 5456     | 86       | 2.61               |
| mmu-miR-141     | 5412     | 94       | 2.06               | mmu-miR-141     | 5400     | 10       | 0.31               |
| mmu-miR-106b    | 5317     | 220      | 4.90               | mmu-miR-106b    | 3913     | 52       | 2.20               |
| mmu-let-7d      | 5064     | 114      | 2.66               | mmu-let-7d      | 4266     | 115      | 4.46               |
| mmu-miR-103     | 4961     | 193      | 4.60               | mmu-miR-103     | 4666     | 118      | 4.18               |
| mmu-miR-125b-5p | 4529     | 137      | 3.58               | mmu-miR-125b-5p | 3219     | 123      | 6.32               |
| mmu-miR-23b     | 4332     | 138      | 3.76               | mmu-miR-23b     | 4179     | 127      | 5.00               |
| mmu-miR-23a     | 4077     | 63       | 1.81               | mmu-miR-23a     | 4648     | 195      | 6.92               |
| mmu-miR-92a     | 3737     | 81       | 2.57               | mmu-miR-92a     | 2563     | 39       | 2.52               |

|                    |            |            |              |                    |            |           |             |
|--------------------|------------|------------|--------------|--------------------|------------|-----------|-------------|
| mmu-miR-30e        | 3295       | 98         | 3.52         | mmu-miR-30e        | 2679       | 65        | 4.01        |
| mmu-miR-21         | 3133       | 809        | 30.57        | mmu-miR-21         | 3378       | 701       | 34.30       |
| mmu-miR-148a       | 3100       | 107        | 4.09         | mmu-miR-148a       | 3125       | 38        | 2.01        |
| mmu-miR-26b        | 3073       | 112        | 4.31         | mmu-miR-26b        | 2970       | 99        | 5.51        |
| mmu-miR-30c        | 3010       | 96         | 3.78         | mmu-miR-30c        | 2705       | 92        | 5.62        |
| mmu-let-7b         | 2889       | 81         | 3.32         | mmu-let-7b         | 3068       | 112       | 6.04        |
| mmu-miR-16         | 2725       | 157        | 6.82         | mmu-miR-16         | 2628       | 146       | 9.18        |
| mmu-miR-429        | 2507       | 41         | 1.94         | mmu-miR-429        | 2768       | 3         | 0.18        |
| mmu-miR-130a       | 2232       | 166        | 8.80         | mmu-miR-130a       | 1397       | 24        | 2.84        |
| mmu-miR-30d        | 2220       | 117        | 6.24         | mmu-miR-30d        | 1979       | 139       | 11.61       |
| mmu-miR-18a        | 1691       | 71         | 4.97         | mmu-miR-18a        | 1271       | 21        | 2.73        |
| mmu-miR-301a       | 1504       | 108        | 8.50         | mmu-miR-301a       | 1077       | 25        | 3.84        |
| mmu-let-7e         | 1453       | 40         | 3.26         | mmu-let-7e         | 815        | 19        | 3.85        |
| mmu-miR-99a        | 1423       | 40         | 3.33         | mmu-miR-99a        | 1377       | 35        | 4.20        |
| mmu-miR-183        | 1372       | 26         | 2.24         | mmu-miR-183        | 943        | 24        | 4.21        |
| mmu-miR-221        | 1353       | 36         | 3.15         | mmu-miR-221        | 1181       | 32        | 4.48        |
| mmu-miR-708        | 1338       | 46         | 4.07         | mmu-miR-708        | 1048       | 39        | 6.15        |
| mmu-miR-30a        | 1331       | 56         | 4.98         | mmu-miR-30a        | 1613       | 60        | 6.15        |
| mmu-miR-19a        | 1324       | 57         | 5.10         | mmu-miR-19a        | 1094       | 23        | 3.48        |
| mmu-miR-34a        | 1323       | 15         | 1.34         | mmu-miR-34a        | 1679       | 22        | 2.17        |
| mmu-miR-30b        | 1307       | 54         | 4.89         | mmu-miR-30b        | 1094       | 56        | 8.46        |
| mmu-miR-210        | 1046       | 31         | 3.51         | mmu-miR-210        | 620        | 2         | 0.53        |
| mmu-miR-191        | 990        | 50         | 5.98         | mmu-miR-191        | 1301       | 45        | 5.72        |
| mmu-miR-25         | 969        | 38         | 4.64         | mmu-miR-25         | 908        | 31        | 5.64        |
| mmu-miR-101b       | 955        | 46         | 5.70         | mmu-miR-101b       | 742        | 27        | 6.01        |
| mmu-miR-182        | 925        | 14         | 1.79         | mmu-miR-182        | 721        | 5         | 1.15        |
| mmu-miR-96         | 901        | 20         | 2.63         | mmu-miR-96         | 783        | 7         | 1.48        |
| mmu-miR-181a       | 875        | 81         | 10.96        | mmu-miR-181a       | 810        | 55        | 11.22       |
| mmu-miR-10a        | 779        | 19         | 2.89         | mmu-miR-10a        | 549        | 10        | 3.01        |
| <b>mmu-miR-320</b> | <b>777</b> | <b>516</b> | <b>78.61</b> | <b>mmu-miR-320</b> | <b>834</b> | <b>11</b> | <b>2.18</b> |

|                    |            |            |              |                    |            |          |             |
|--------------------|------------|------------|--------------|--------------------|------------|----------|-------------|
| mmu-miR-125a-5p    | 773        | 22         | 3.37         | mmu-miR-125a-5p    | 619        | 10       | 2.67        |
| mmu-miR-15a        | 744        | 70         | 11.14        | mmu-miR-15a        | 781        | 42       | 8.89        |
| mmu-miR-98         | 661        | 20         | 3.58         | mmu-miR-98         | 584        | 14       | 3.96        |
| mmu-miR-744        | 610        | 17         | 3.30         | mmu-miR-744        | 842        | 15       | 2.94        |
| mmu-miR-15b        | 545        | 20         | 4.34         | mmu-miR-15b        | 563        | 33       | 9.69        |
| mmu-miR-107        | 534        | 13         | 2.96         | mmu-miR-107        | 567        | 9        | 2.62        |
| mmu-miR-22         | 498        | 27         | 6.42         | mmu-miR-22         | 1010       | 35       | 5.73        |
| <b>mmu-miR-484</b> | <b>476</b> | <b>353</b> | <b>87.78</b> | <b>mmu-miR-484</b> | <b>441</b> | <b>7</b> | <b>2.62</b> |
| mmu-miR-378        | 456        | 25         | 6.49         | mmu-miR-378        | 410        | 11       | 4.43        |
| mmu-miR-33         | 437        | 20         | 5.42         | mmu-miR-33         | 394        | 8        | 3.36        |
| mmu-miR-181d       | 396        | 8          | 2.39         | mmu-miR-181d       | 338        | 5        | 2.45        |

Note: The numbers are reads mapped to each microRNA.

The remaining ratio was normalized with reads from other small RNAs in each pair of libraries.
